# Supplementary material for: Transcriptional patterns of cancer-related genes in primary and metastatic tumours revealed by machine learning
Source: Springer Nature journal article supplement (doi:10.1186/s12915-025-02339-z), 2025-08-07
Supplement: MOESM1 [file 12915_2025_2339_MOESM1_ESM.pdf]

## **Extended Methods**

### Data Preprocessing

Expression matrices containing TPM (transcript per million) values and CNA data were obtained from the University of California Santa Cruz repository. SNV/INDEL data files were downloaded from GDC data portal, and germline mutation data file was downloaded from genomic data commons website. Structural variation files for TCGA study were downloaded from cBioPortal. As for the POG study, processed expression and gene variation data from 608 patients with metastatic disease who were recruited before any chemotherapy or after one line of chemotherapy were obtained from the Canada's Michael Smith Genome Sciences Centre servers. TCGA expression, somatic SNV/INDEL and CNA data files were used to find samples with all data types which provided 8726 samples. TCGA and POG expression matrices were consolidated based on a list of comparable genes that overlap between both datasets that resulted in a total of 56,645 transcribed genes, of which 18,606 (33%) are annotated as protein coding. The Principal Component Analysis (PCA) plots of  $\log_2(\text{TPM}+0.001)$  values showed that, despite tumour or disease (metastatic or primary tumour) type, expression profiles clustered together (Figures S1-S3).

To increase the likelihood of benefiting a larger number of patients while keeping a feasible list of genes, frequently mutated genes and the ones essential in cancer biology were prioritized. Using a minimum threshold of 2% mutation rate across all cancers, 135 frequently mutated genes were obtained from the Mendiratta et al study. Overlap with Kandoth et al. paper's 127 significantly mutated genes and 299 cancer driver genes found by Bailey et al. yielded 50 shared genes for downstream analysis of transcriptome modifications. Tumour samples were grouped by mutational status (mutated vs wildtype) for each gene using somatic and germline mutation data. The samples in the mutated group were further divided into "impactful" and "non-impactful" categories based on expected consequences of mutations. The samples containing mutations deemed "Low" or "Modifier" impact by Ensembl (version 107), were placed in the "non-impactful" group, as these either result in no protein modification or have uncertain effects. The remaining samples containing mutations were categorized as "impactful" and were used to create feature matrices along with samples containing wildtype gene copies. Samples with "non-impactful" mutations were excluded to increase the likelihood of only pathogenic driver alterations being used for learning. For analyses including CNA and SV data, samples with copy number changes or structural variations were reclassified as "impactful".

### Random Forests Initial Performance

Prior to training the RF model, the main hyperparameters were fine-tuned using 90% of the available samples, following the approach detailed in our prior study. The obtained values were subsequently validated using the remaining 10% of the samples to ensure the model's generalizability. Samples initially were categorized as either wild-type or mutant based solely on SNVs/INDELs data. The performance of the RF model was evaluated using 5-fold cross-validation (CV) across both TCGA and POG datasets for all the genes of interest. F1 scores were computed to gauge the model's effectiveness, and the ratios of samples with "impactful" mutations to those with wild-type gene copies were also calculated. These ratios provided insight into how the imbalance between the two classes might influence the performance (Figure 1A).

### Addition of More Data Types

To evaluate the impact of additional gene alterations, CNAs and SVs were incorporated into the analyses. Samples with different combinations of alterations were categorized as mutants, and the RF model's performance was evaluated across 30 permutations for each setting. Average F1 scores and standard deviations were calculated and compared (Figure S5). Since SVs had minimal impact on F1 scores, the focus was narrowed to SNVs/INDELs and CNAs (Figure 1B). Samples with CNAs were only labeled as mutant if their inclusion resulted in a substantial improvement in F1 score.

To validate the analysis settings (using SNVs/INDELs data alone or combined with CNAs), 10% of samples were randomly set aside, while maintaining the mutant-to-wild-type ratio. The model was trained on the remaining samples and tested on the reserved 10%. The test F1 scores were compared to the previously obtained 5-fold CV F1 scores (Figure S6). Once settings were confirmed, the RF model was trained on all TCGA and POG samples. The final F1 score and the ratio of mutant to wild-type samples were recorded (Figure 1C).

### Tumour Type Specific Analysis and Class Imbalance at the Tumour Type Level

To determine whether the model's strong performance is specific to certain cancer types or consistent across a pan-cancer setting, F1 scores were plotted against the ratio of minor (the set of either mutant or wild-type samples, whichever is smaller) to major group sizes across 33 TCGA tumour types (Figure 2). F1 scores for some genes varied widely across tumour types, so a statistical test was used to establish significance. Specifically, for each gene and tumour type

with at least 10 mutated samples, the RF model was evaluated using 5-fold CV. F1 scores were plotted (Figure S7), and since the distribution followed a normal curve, a z-test with alpha of 0.1 was performed. A significance threshold of 0.728 was obtained for F1 scores. For each gene of interest, tumour types with F1 scores above this threshold were selected for downstream analysis, or the tumour type with the highest F1 score was chosen if none met the threshold (Table S1).

To compare the model's performance between pan-cancer and tumour type specific analyses, selected tumour types were used in 30 permutations of 5-fold CV. Average and standard deviation of F1 scores were calculated and compared to the pan-cancer results (Figure 3A). Tumour-specific analyses were pursued only if the average F1 score improved by more than 5%, accounting for reduced sample size.

The impact of class imbalance at the tumour type level was then examined. Tumour types with poor classification performance for *BRAF* mutations were balanced and the model's performance was re-evaluated (Figure S8). This improved F1 scores for some tumour types, prompting further analysis. Specifically, for each gene and tumour type with at least 10 mutated samples, the larger group (mutated or wild-type) was down-sampled to create balanced sets. 5-fold CV was performed, and F1 scores were obtained. A distribution graph of the F1 scores was generated (Figure S9) and a z-test with alpha of 0.1 resulted in a significance threshold of 0.785. Tumour types with F1 scores above this threshold were selected for downstream analysis. If the F1 score of no tumour type exceeded this score, the one with the highest balanced F1 score was chosen (Table S2).

30 permutations of 5-fold CV were performed on the selected tumour types, and the average F1 scores and standard deviations were calculated. Additionally, balanced sets from all tumour types were analyzed in the same way, and average F1 scores were compared across all settings (Figure 3B). Subsequently, the analysis focused on balanced sets of specific tumour types only when the average F1 score showed an improvement of more than 5%, as down-sampling reduces training samples. For genes where the most significant F1 scores were achieved in settings with multiple tumour types (balanced or unbalanced), model performance was further investigated both within individual cancer types and across the combined set (Tables S3-S17). If performance dropped for one of the tumour types in the combined set, that tumour type was excluded, and performance was re-evaluated (Tables S18-S22).

Examining the list of top-ranked genes in classification revealed that in some instances, all or majority of the genes were located at nearby chromosomal regions to the gene under investigation, likely due to the inclusion of CNAs in the analysis. This aligns with biological expectations, because CNAs typically affect larger chromosomal regions compared to SNVs/INDELs and genes located in proximity are likely impacted by the same copy number events, resulting in correlated expression changes. To mitigate this and ensure that the observed transcriptional modifications were associated with alterations in the function of the genes of

interest, nearby cytobands containing genes that highly contributed to classification were flagged. The cytobands coordinates were found using the NCBI ideogram file, and genes within the cytobands were obtained via the BioMart data mining tool. Genes from these regions were iteratively removed until no cluster of physically adjacent genes appeared among the top-ranked genes. The final excluded chromosomal coordinates are in table S23. Once removing nearby genes, the top contributing genes to classification were examined for their associations with the genes of interest, based on retrieved literature (Tables S24-S56). In specific cases, like *APC* and *BRAF*, evaluating F1 scores and top genes in classification led to a revision of the analysis approach (Figure S10 and Tables S57-S59).

### Examining Transcriptional Patterns

After determining the optimal analysis setting and training the model for each gene of interest, thresholds for selecting key genes in classification were established using a permutation-based method, described in our previous work. Gini importance scores were plotted to gene ranks, and thresholds for identifying the top genes were set accordingly (examples are provided in Figures S11 and S12).

Some genes, when trained with the top 1000 genes (features) and randomly shuffled labels, showed higher feature importance scores than when using the true mutational labels. These genes also tended to exhibit lower F1 or top Gini scores compared to other genes. Thus, these genes were considered to have no or weak transcriptional patterns (Figures S13 and S14). To formally define a threshold for no or weak transcriptional signals, 5-fold CV F1 scores, along with the Gini score of the most influential feature in classification, were obtained and their distributions were plotted (Figures S15 and S16). Since the distribution of F1 scores followed a normal curve, a z-test with an alpha of 0.1 was performed, yielding a significance lower threshold of 0.686. The distribution of top Gini scores was right-skewed, so the lower percentile was calculated with an alpha of 0.25, giving a lower critical value of 0.0021. Genes with F1 scores below 0.686 or top Gini scores below 0.0021 were categorized as having no or weak transcriptional patterns. Moreover, a few genes were identified with high F1 scores but low top Gini scores. These genes were flagged for potential overfitting, especially since for all of them, a balanced set of one or two tumour types were used during classification. Low Gini scores also indicate that none of the features contributed meaningfully to the classification. Consequently, these genes, along with those categorized as having no or weak transcriptional patterns, were excluded from further analysis.

For the remaining genes, associations between the top 15 genes and the genes of interest were gathered from literature (Tables S24-S56). If fewer than 15 genes passed the threshold, associations for all contributing genes were investigated. The number of important genes in the

classification is shown in figure 5. These genes were further used in Gene Set Enrichment Analysis (GSEA) using the Database for Annotation, Visualization, and Integration Discovery (DAVID). A threshold of 0.05 was applied for p-values, adjusted for multiple testing using the Benjamini-Hochberg method. The top five enriched pathways for genes of interest are in table S60. If fewer than five pathways met the threshold, all were reported. SHAP importance was also found using the Python SHAP package for the top 15 features of the three genes with highest top Gini scores (Figures S17-S19).

Next, the mutational status of samples with non-impactful mutations was predicted using the fully trained RF model. When the majority of samples were classified as mutant, these were further examined using the Integrative Genomic Viewer (IGV), as it was expected to have no change in the produced proteins and a similar behavior to the wildtype category.

## Supplementary Tables

Table S1. Tumour types selected for downstream analysis on tumour-type specific transcriptional modifications. COAD and READ tumour types were combined. TCGA tumour types: ACC=Adrenocortical carcinoma, BLCA=Bladder Urothelial Carcinoma, BRCA=Breast invasive carcinoma, CESC=Cervical squamous cell carcinoma and endocervical adenocarcinoma, CHOL=Cholangiocarcinoma, COAD=Colon adenocarcinoma, DLBC=Lymphoid Neoplasm Diffuse Large B-cell Lymphoma, ESCA=Esophageal carcinoma, GBM=Glioblastoma multiforme, HNSC=Head and Neck squamous cell carcinoma, KICH=Kidney Chromophobe, KIRC=Kidney renal clear cell carcinoma, KIRP=Kidney renal papillary cell carcinoma, LAML=Acute Myeloid Leukemia, LGG=Brain Lower Grade Glioma, LIHC=Liver hepatocellular carcinoma, LUAD=Lung adenocarcinoma, LUSC=Lung squamous cell carcinoma, MESO=Mesothelioma, OV=Ovarian serous cystadenocarcinoma, PAAD=Pancreatic adenocarcinoma, PCPG=Pheochromocytoma and Paraganglioma, PRAD=Prostate adenocarcinoma, READ=Rectum adenocarcinoma, SARC=Sarcoma, SKCM=Skin Cutaneous Melanoma, STAD=Stomach adenocarcinoma, TGCT=Testicular Germ Cell Tumors, THCA=Thyroid carcinoma, THYM=Thymoma, UCEC=Uterine Corpus Endometrial Carcinoma, UCS=Uterine Carcinosarcoma, UVM=Uveal Melanoma.

| Gene   | Tumour Types               |
|--------|----------------------------|
| APC    | COADREAD                   |
| AR     | KIRP                       |
| ARID1A | BRCA, LGG, LIHC, PCPG, UVM |
| ASXL1  | BRCA, CESC                 |
| ATM    | BRCA, CESC, PCPG           |
| ATR    | HNSC, KIRP, PCPG           |
| ATRX   | LGG                        |
| BRAF   | COADREAD, SKCM, THCA       |

|        |                                                         |
|--------|---------------------------------------------------------|
| BRCA1  | BRCA, KICH, KIRP, UCEC                                  |
| BRCA2  | BRCA                                                    |
| CDH1   | KIRP, LIHC, PRAD, SARC, THYM, UCEC, UVM                 |
| CDK12  | BRCA, KICH, KIRP, SARC, UCEC                            |
| CDKN2A | HNSC, KIRC, LGG, MESO, PAAD, UCEC                       |
| CTCF   | KIRP, LIHC, PRAD, SARC, THYM, UVM                       |
| CTNNB1 | BRCA, CESC, HNSC, KIRC, LIHC, PCPG, UVM                 |
| EGFR   | COADREAD, HNSC, KIRP, LGG, STAD, THCA                   |
| EP300  | BRCA, PCPG, THCA, UCEC                                  |
| ERBB4  | CEC, PAAD                                               |
| EZH2   | COADREAD, KIRP, LGG, THCA, THYM                         |
| FBXW7  | LIHC, MESO, UCEC                                        |
| FLT3   | UCEC                                                    |
| GATA3  | LGG, SARC                                               |
| KDM6A  | KIRP, UCEC                                              |
| KEAP1  | GBM, LUAD, STAD, UCEC                                   |
| KIT    | ACC, KICH                                               |
| KRAS   | COADREAD, PAAD                                          |
| MAP3K1 | BLCA, HNSC, PRAD, STAD                                  |
| MECOM  | UCEC, UVM                                               |
| MTOR   | BRCA, LGG, PCPG                                         |
| NCOR1  | BRCA, COADREAD, KICH, KIRP, LIHC, PAAD, PCPG, UCEC      |
| NF1    | BRCA, KICH, KIRP, PCPG, SARC, UCEC                      |
| NFE2L2 | KICH, THCA                                              |
| NOTCH1 | KIRC                                                    |
| NRAS   | LGG, PCPG                                               |
| NSD1   | BLCA, HNSC, KIRC                                        |
| PBRM1  | BRCA, CESC, HNSC, KIRC, KIRP, PCPG, UVM                 |
| PDGFRA | KICH                                                    |
| PIK3CA | KIRP, PCPG, UVM                                         |
| PIK3R1 | BLCA, HNSC, STAD                                        |
| POLQ   | BRCA                                                    |
| PTEN   | LGG, PRAD, SARC, SKCM                                   |
| RB1    | BRCA, CESC, COADREAD, GBM, LGG, LIHC, PRAD, SARC        |
| SETBP1 | HNSC, PRAD                                              |
| SETD2  | BRCA, CESC, HNSC, KIRC, KIRP, PCPG, UVM                 |
| SF3B1  | UVM                                                     |
| SMAD4  | STAD                                                    |
| SPOP   | BRCA, KICH, KIRP                                        |
| STAG2  | KIRP                                                    |
| TET2   | LIHC, MESO                                              |
| TP53   | BLCA, BRCA, COADREAD, HNSC, LGG, LIHC, LUAD, STAD, UCEC |

Table S2. Tumour types selected for downstream analysis on examining transcriptional modifications using balanced sets of specific tumour-type. COAD and READ tumour types were combined.

| Gene | Tumour Types |
|------|--------------|
|------|--------------|

|        |                                                    |
|--------|----------------------------------------------------|
| APC    | COADREAD                                           |
| AR     | THCA                                               |
| ARID1A | KICH, KIRP, LGG, PCPG, THYM, UVM                   |
| ASXL1  | COADREAD                                           |
| ATM    | BRCA, CESC, PCPG, TGCT                             |
| ATR    | CESC, KIRP, PCPG                                   |
| ATRX   | LGG, UCEC                                          |
| BRAF   | COADREAD, THCA                                     |
| BRCA1  | KICH, KIRP, UCEC                                   |
| BRCA2  | COADREAD                                           |
| CDH1   | BRCA, KIRP, LIHC, OV, PRAD, UVM                    |
| CDK12  | KIRP, UCEC                                         |
| CDKN2A | KIRC, KIRP, PAAD, THCA, UCEC                       |
| CTCF   | BRCA, KIRP, LIHC, PRAD, THYM                       |
| CTNNB1 | HNSC, KIRC, PCPG, UVM                              |
| EGFR   | COADREAD, KIRP, LGG                                |
| EP300  | THCA, UVM                                          |
| ERBB4  | CESC                                               |
| EZH2   | KIRP, LGG, THCA, THYM                              |
| FBXW7  | LIHC, MESO                                         |
| FLT3   | COADREAD                                           |
| GATA3  | KIRP, LGG                                          |
| KDM6A  | KIRC                                               |
| KEAP1  | THCA                                               |
| KIT    | KIRC                                               |
| KRAS   | PAAD, STAD                                         |
| MAP3K1 | STAD, THCA                                         |
| MECOM  | LUSC, PCPG, UVM                                    |
| MTOR   | LGG, PCPG                                          |
| NCOR1  | BRCA, COADREAD, KICH, KIRP, LAML, LIHC, PCPG, THCA |
| NF1    | KICH, KIRP, PCPG                                   |
| NFE2L2 | KICH, THCA                                         |
| NOTCH1 | KIRC                                               |
| NRAS   | LGG, PCPG, THCA, UCEC                              |
| NSD1   | KICH, KIRC, PRAD, THYM                             |
| PBRM1  | HNSC, KIRC, MESO, PCPG, THYM, UVM                  |
| PDGFRA | KICH                                               |
| PIK3CA | HNSC, KIRP, LUSC, PCPG, UVM                        |
| PIK3R1 | THYM                                               |
| POLQ   | BRCA, HNSC                                         |
| PTEN   | LGG, PRAD, SARC, SKCM                              |
| RB1    | COADREAD, LGG, LIHC, PRAD, SARC                    |
| SETBP1 | COADREAD, HNSC, PRAD                               |
| SETD2  | HNSC, KIRC, PCPG, UVM                              |
| SF3B1  | KICH                                               |
| SMAD4  | COADREAD, THYM                                     |
| SPOP   | KICH, KIRP, THCA, THYM                             |
| STAG2  | THCA                                               |
| TET2   | MESO                                               |

|      |                                             |
|------|---------------------------------------------|
| TP53 | BRCA, COADREAD, LGG, LIHC, LUAD, SKCM, UCEC |
|------|---------------------------------------------|

Table S3. Number of mutant and wild-type samples as well as F1 score of classification based on ARID1A alterations across selected tumour types and their combination

| <b>Tumour Type</b>    | <b>Number of Mutant Samples</b> | <b>Number of Wild-type Samples</b> | <b>F1 Score for Individual Tumour Type</b> | <b>F1 Score for the Combined Set</b> |
|-----------------------|---------------------------------|------------------------------------|--------------------------------------------|--------------------------------------|
| KICH                  | 12                              | 12                                 | 0.83                                       | 0.83                                 |
| KIRP                  | 59                              | 59                                 | 0.81                                       | 0.86                                 |
| LGG                   | 207                             | 207                                | 0.92                                       | 0.93                                 |
| PCPG                  | 57                              | 57                                 | 0.89                                       | 0.92                                 |
| THYM                  | 10                              | 10                                 | 0.90                                       | 0.73                                 |
| UVM                   | 29                              | 29                                 | 0.90                                       | 0.92                                 |
| Combined Set of Above | 374                             | 374                                | -                                          | 0.91                                 |

Table S4. Number of mutant and wild-type samples as well as F1 score of classification based on BRAF alterations across selected tumour types and their combination

| <b>Tumour Type</b>    | <b>Number of Mutant Samples</b> | <b>Number of Wild-type Samples</b> | <b>F1 Score for Individual Tumour Type</b> | <b>F1 Score for the Combined Set</b> |
|-----------------------|---------------------------------|------------------------------------|--------------------------------------------|--------------------------------------|
| COADREAD              | 56                              | 56                                 | 0.86                                       | 0.85                                 |
| THCA                  | 198                             | 198                                | 0.93                                       | 0.95                                 |
| Combined Set of Above | 254                             | 254                                | -                                          | 0.93                                 |

Table S5. Number of mutant and wild-type samples as well as F1 score of classification based on BRCA1 alterations across selected tumour types and their combination

| <b>Tumour Type</b>    | <b>Number of Mutant Samples</b> | <b>Number of Wild-type Samples</b> | <b>F1 Score for Individual Tumour Type</b> | <b>F1 Score for the Combined Set</b> |
|-----------------------|---------------------------------|------------------------------------|--------------------------------------------|--------------------------------------|
| KICH                  | 16                              | 16                                 | 0.84                                       | 0.87                                 |
| KIRP                  | 91                              | 91                                 | 0.87                                       | 0.87                                 |
| UCEC                  | 79                              | 79                                 | 0.81                                       | 0.77                                 |
| Combined Set of Above | 186                             | 186                                | -                                          | 0.83                                 |

Table S6. Number of mutant and wild-type samples as well as F1 score of classification based on CDH1 alterations across selected tumour types and their combination

| <b>Tumour Type</b> | <b>Number of Mutant Samples</b> | <b>Number of Wild-type Samples</b> | <b>F1 Score for Individual Tumour Type</b> | <b>F1 Score for the Combined Set</b> |
|--------------------|---------------------------------|------------------------------------|--------------------------------------------|--------------------------------------|
|--------------------|---------------------------------|------------------------------------|--------------------------------------------|--------------------------------------|

|                       |     |      |      |      |
|-----------------------|-----|------|------|------|
| KIRP                  | 148 | 127  | 0.87 | 0.85 |
| LIHC                  | 171 | 182  | 0.81 | 0.82 |
| PRAD                  | 150 | 332  | 0.83 | 0.80 |
| SARC                  | 157 | 118  | 0.77 | 0.79 |
| THYM                  | 15  | 104  | 0.75 | 0.83 |
| UCEC                  | 75  | 88   | 0.80 | 0.82 |
| UVM                   | 22  | 64   | 0.86 | 0.79 |
| Combined Set of Above | 738 | 1015 | -    | 0.83 |

Table S7. Number of mutant and wild-type samples as well as F1 score of classification based on CTNNB1 alterations across selected tumour types and their combination

| <b>Tumour Type</b>    | <b>Number of Mutant Samples</b> | <b>Number of Wild-type Samples</b> | <b>F1 Score for Individual Tumour Type</b> | <b>F1 Score for the Combined Set</b> |
|-----------------------|---------------------------------|------------------------------------|--------------------------------------------|--------------------------------------|
| HNSC                  | 127                             | 127                                | 0.89                                       | 0.84                                 |
| KIRC                  | 38                              | 38                                 | 0.81                                       | 0.82                                 |
| PCPG                  | 65                              | 65                                 | 0.83                                       | 0.89                                 |
| UVM                   | 39                              | 39                                 | 0.94                                       | 0.94                                 |
| Combined Set of Above | 269                             | 269                                | -                                          | 0.86                                 |

Table S8. Number of mutant and wild-type samples as well as F1 score of classification based on EGFR alterations across selected tumour types and their combination

| <b>Tumour Type</b>    | <b>Number of Mutant Samples</b> | <b>Number of Wild-type Samples</b> | <b>F1 Score for Individual Tumour Type</b> | <b>F1 Score for the Combined Set</b> |
|-----------------------|---------------------------------|------------------------------------|--------------------------------------------|--------------------------------------|
| COADREAD              | 281                             | 149                                | 0.76                                       | 0.81                                 |
| HNSC                  | 242                             | 252                                | 0.73                                       | 0.77                                 |
| KIRP                  | 169                             | 107                                | 0.86                                       | 0.89                                 |
| LGG                   | 130                             | 369                                | 0.83                                       | 0.82                                 |
| STAD                  | 215                             | 190                                | 0.73                                       | 0.77                                 |
| THCA                  | 18                              | 464                                | 0.73                                       | 0.55                                 |
| Combined Set of Above | 1055                            | 1531                               | -                                          | 0.85                                 |

Table S9. Number of mutant and wild-type samples as well as F1 score of classification based on EZH2 alterations across selected tumour types and their combination

| <b>Tumour Type</b> | <b>Number of Mutant Samples</b> | <b>Number of Wild-type Samples</b> | <b>F1 Score for Individual Tumour Type</b> | <b>F1 Score for the Combined Set</b> |
|--------------------|---------------------------------|------------------------------------|--------------------------------------------|--------------------------------------|
| COADREAD           | 239                             | 188                                | 0.76                                       | 0.78                                 |
| KIRP               | 167                             | 109                                | 0.85                                       | 0.88                                 |

|                       |     |      |      |      |
|-----------------------|-----|------|------|------|
| LGG                   | 176 | 323  | 0.84 | 0.82 |
| THCA                  | 21  | 460  | 0.73 | 0.63 |
| THYM                  | 20  | 99   | 0.73 | 0.74 |
| Combined Set of Above | 623 | 1179 | -    | 0.86 |

Table S10. Number of mutant and wild-type samples as well as F1 score of classification based on KDM6A alterations across selected tumour types and their combination

| <b>Tumour Type</b>    | <b>Number of Mutant Samples</b> | <b>Number of Wild-type Samples</b> | <b>F1 Score for Individual Tumour Type</b> | <b>F1 Score for the Combined Set</b> |
|-----------------------|---------------------------------|------------------------------------|--------------------------------------------|--------------------------------------|
| KIRP                  | 129                             | 147                                | 0.74                                       | 0.78                                 |
| UCEC                  | 77                              | 82                                 | 0.73                                       | 0.73                                 |
| Combined Set of Above | 206                             | 229                                | -                                          | 0.76                                 |

Table S11. Number of mutant and wild-type samples as well as F1 score of classification based on NRAS alterations across selected tumour types and their combination

| <b>Tumour Type</b>    | <b>Number of Mutant Samples</b> | <b>Number of Wild-type Samples</b> | <b>F1 Score for Individual Tumour Type</b> | <b>F1 Score for the Combined Set</b> |
|-----------------------|---------------------------------|------------------------------------|--------------------------------------------|--------------------------------------|
| LGG                   | 198                             | 302                                | 0.94                                       | 0.94                                 |
| PCPG                  | 119                             | 43                                 | 0.75                                       | 0.75                                 |
| Combined Set of Above | 317                             | 345                                | -                                          | 0.92                                 |

Table S12. Number of mutant and wild-type samples as well as F1 score of classification based on PBRM1 alterations across selected tumour types and their combination

| <b>Tumour Type</b>    | <b>Number of Mutant Samples</b> | <b>Number of Wild-type Samples</b> | <b>F1 Score for Individual Tumour Type</b> | <b>F1 Score for the Combined Set</b> |
|-----------------------|---------------------------------|------------------------------------|--------------------------------------------|--------------------------------------|
| HNSC                  | 122                             | 122                                | 0.84                                       | 0.89                                 |
| KIRC                  | 35                              | 35                                 | 0.83                                       | 0.87                                 |
| MESO                  | 28                              | 28                                 | 0.80                                       | 0.80                                 |
| PCPG                  | 66                              | 66                                 | 0.84                                       | 0.90                                 |
| THYM                  | 15                              | 15                                 | 0.90                                       | 0.70                                 |
| UVM                   | 40                              | 40                                 | 0.94                                       | 0.96                                 |
| Combined Set of Above | 306                             | 306                                | -                                          | 0.88                                 |

Table S13. Number of mutant and wild-type samples as well as F1 score of classification based on PIK3CA alterations across selected tumour types and their combination

| <b>Tumour Type</b>    | <b>Number of Mutant Samples</b> | <b>Number of Wild-type Samples</b> | <b>F1 Score for Individual Tumour Type</b> | <b>F1 Score for the Combined Set</b> |
|-----------------------|---------------------------------|------------------------------------|--------------------------------------------|--------------------------------------|
| KIRP                  | 103                             | 173                                | 0.81                                       | 0.79                                 |
| PCPG                  | 96                              | 65                                 | 0.87                                       | 0.85                                 |
| UVM                   | 47                              | 40                                 | 0.93                                       | 0.95                                 |
| Combined Set of Above | 246                             | 278                                | -                                          | 0.84                                 |

Table S14. Number of mutant and wild-type samples as well as F1 score of classification based on PTEN alterations across selected tumour types and their combination

| <b>Tumour Type</b>    | <b>Number of Mutant Samples</b> | <b>Number of Wild-type Samples</b> | <b>F1 Score for Individual Tumour Type</b> | <b>F1 Score for the Combined Set</b> |
|-----------------------|---------------------------------|------------------------------------|--------------------------------------------|--------------------------------------|
| LGG                   | 120                             | 380                                | 0.86                                       | 0.86                                 |
| PRAD                  | 165                             | 318                                | 0.81                                       | 0.80                                 |
| SARC                  | 154                             | 124                                | 0.76                                       | 0.75                                 |
| SKCM                  | 245                             | 132                                | 0.79                                       | 0.80                                 |
| Combined Set of Above | 684                             | 954                                | -                                          | 0.84                                 |

Table S15. Number of mutant and wild-type samples as well as F1 score of classification based on SETBP1 alterations across selected tumour types and their combination

| <b>Tumour Type</b>    | <b>Number of Mutant Samples</b> | <b>Number of Wild-type Samples</b> | <b>F1 Score for Individual Tumour Type</b> | <b>F1 Score for the Combined Set</b> |
|-----------------------|---------------------------------|------------------------------------|--------------------------------------------|--------------------------------------|
| COADREAD              | 97                              | 97                                 | 0.83                                       | 0.89                                 |
| HNSC                  | 212                             | 212                                | 0.79                                       | 0.83                                 |
| PRAD                  | 123                             | 123                                | 0.83                                       | 0.80                                 |
| Combined Set of Above | 432                             | 432                                | -                                          | 0.83                                 |

Table S16. Number of mutant and wild-type samples as well as F1 score of classification based on SETD2 alterations across selected tumour types and their combination

| <b>Tumour Type</b>    | <b>Number of Mutant Samples</b> | <b>Number of Wild-type Samples</b> | <b>F1 Score for Individual Tumour Type</b> | <b>F1 Score for the Combined Set</b> |
|-----------------------|---------------------------------|------------------------------------|--------------------------------------------|--------------------------------------|
| HNSC                  | 123                             | 123                                | 0.87                                       | 0.88                                 |
| KIRC                  | 37                              | 37                                 | 0.82                                       | 0.84                                 |
| PCPG                  | 67                              | 67                                 | 0.84                                       | 0.87                                 |
| UVM                   | 38                              | 38                                 | 0.95                                       | 0.94                                 |
| Combined Set of Above | 265                             | 265                                | -                                          | 0.88                                 |

Table S17. Number of mutant and wild-type samples as well as F1 score of classification based on SPOP alterations across selected tumour types and their combination

| <b>Tumour Type</b>    | <b>Number of Mutant Samples</b> | <b>Number of Wild-type Samples</b> | <b>F1 Score for Individual Tumour Type</b> | <b>F1 Score for the Combined Set</b> |
|-----------------------|---------------------------------|------------------------------------|--------------------------------------------|--------------------------------------|
| KICH                  | 16                              | 16                                 | 0.87                                       | 0.66                                 |
| KIRP                  | 87                              | 87                                 | 0.88                                       | 0.88                                 |
| THCA                  | 21                              | 21                                 | 0.83                                       | 0.93                                 |
| THYM                  | 14                              | 14                                 | 0.79                                       | 0.77                                 |
| Combined Set of Above | 138                             | 138                                | -                                          | 0.85                                 |

Table S18. Number of mutant and wild-type samples as well as F1 score of classification based on ARID1A alterations across selected tumour types and their combination after excluding THYM samples

| <b>Tumour Type</b>    | <b>Number of Mutant Samples</b> | <b>Number of Wild-type Samples</b> | <b>F1 Score for Individual Tumour Type</b> | <b>F1 Score for the Combined Set</b> |
|-----------------------|---------------------------------|------------------------------------|--------------------------------------------|--------------------------------------|
| KICH                  | 12                              | 12                                 | 0.83                                       | 0.78                                 |
| KIRP                  | 59                              | 59                                 | 0.81                                       | 0.86                                 |
| LGG                   | 207                             | 207                                | 0.92                                       | 0.92                                 |
| PCPG                  | 57                              | 57                                 | 0.89                                       | 0.93                                 |
| UVM                   | 29                              | 29                                 | 0.90                                       | 0.90                                 |
| Combined Set of Above | 364                             | 364                                | -                                          | 0.90                                 |

Table S19. Number of mutant and wild-type samples as well as F1 score of classification based on EGFR alterations across selected tumour types and their combination after excluding THCA samples

| <b>Tumour Type</b>    | <b>Number of Mutant Samples</b> | <b>Number of Wild-type Samples</b> | <b>F1 Score for Individual Tumour Type</b> | <b>F1 Score for the Combined Set</b> |
|-----------------------|---------------------------------|------------------------------------|--------------------------------------------|--------------------------------------|
| COADREAD              | 281                             | 149                                | 0.76                                       | 0.80                                 |
| HNSC                  | 242                             | 252                                | 0.73                                       | 0.76                                 |
| KIRP                  | 169                             | 107                                | 0.86                                       | 0.87                                 |
| LGG                   | 130                             | 369                                | 0.83                                       | 0.82                                 |
| STAD                  | 215                             | 190                                | 0.73                                       | 0.77                                 |
| Combined Set of Above | 1037                            | 1067                               | -                                          | 0.82                                 |

Table S20. Number of mutant and wild-type samples as well as F1 score of classification based on EZH2 alterations across selected tumour types and their combination after excluding THCA samples

| <b>Tumour Type</b>    | <b>Number of Mutant Samples</b> | <b>Number of Wild-type Samples</b> | <b>F1 Score for Individual Tumour Type</b> | <b>F1 Score for the Combined Set</b> |
|-----------------------|---------------------------------|------------------------------------|--------------------------------------------|--------------------------------------|
| COADREAD              | 239                             | 188                                | 0.76                                       | 0.83                                 |
| KIRP                  | 167                             | 109                                | 0.85                                       | 0.89                                 |
| LGG                   | 176                             | 323                                | 0.84                                       | 0.82                                 |
| THYM                  | 20                              | 99                                 | 0.73                                       | 0.80                                 |
| Combined Set of Above | 602                             | 719                                | -                                          | 0.85                                 |

Table S21. Number of mutant and wild-type samples as well as F1 score of classification based on PBRM1 alterations across selected tumour types and their combination after excluding THYM samples

| <b>Tumour Type</b>    | <b>Number of Mutant Samples</b> | <b>Number of Wild-type Samples</b> | <b>F1 Score for Individual Tumour Type</b> | <b>F1 Score for the Combined Set</b> |
|-----------------------|---------------------------------|------------------------------------|--------------------------------------------|--------------------------------------|
| HNSC                  | 122                             | 122                                | 0.84                                       | 0.86                                 |
| KIRC                  | 35                              | 35                                 | 0.83                                       | 0.83                                 |
| MESO                  | 28                              | 28                                 | 0.80                                       | 0.84                                 |
| PCPG                  | 66                              | 66                                 | 0.84                                       | 0.87                                 |
| UVM                   | 40                              | 40                                 | 0.94                                       | 0.97                                 |
| Combined Set of Above | 291                             | 291                                | -                                          | 0.87                                 |

Table S22. Number of mutant and wild-type samples as well as F1 score of classification based on SPOP alterations across selected tumour types and their combination after excluding KICH samples

| <b>Tumour Type</b>    | <b>Number of Mutant Samples</b> | <b>Number of Wild-type Samples</b> | <b>F1 Score for Individual Tumour Type</b> | <b>F1 Score for the Combined Set</b> |
|-----------------------|---------------------------------|------------------------------------|--------------------------------------------|--------------------------------------|
| KIRP                  | 87                              | 87                                 | 0.88                                       | 0.87                                 |
| THCA                  | 21                              | 21                                 | 0.83                                       | 0.93                                 |
| THYM                  | 14                              | 14                                 | 0.79                                       | 0.85                                 |
| Combined Set of Above | 122                             | 122                                | -                                          | 0.88                                 |

Table S23. The chromosome coordinates used to exclude genes in close proximity to the genes of interest

| Gene under Investigation | Chromosome                                     | Start     | End       |
|--------------------------|------------------------------------------------|-----------|-----------|
| APC                      | N/A (Only SNVs/INDELs were used for this gene) |           |           |
| AR                       | N/A (No genes/regions were excluded)           |           |           |
| ARID1A                   | 1                                              | 1         | 123400000 |
| ASXL1                    | 20                                             | 30400001  | 64444167  |
| ATM                      | 11                                             | 63600001  | 135086622 |
| ATR                      | 3                                              | 113700001 | 198295559 |
| ATRX                     | N/A (Only SNVs/INDELs were used for this gene) |           |           |
| BRAF                     | N/A (Only SNVs/INDELs were used for this gene) |           |           |
| BRCA1                    | 17                                             | 1         | 83257441  |
| BRCA2                    | 13                                             | 27200001  | 50300000  |
| CDH1                     | 16                                             | 1         | 90338345  |
| CDK12                    | 17                                             | 1         | 83257441  |
| CDKN2A                   | 9                                              | 18500001  | 28000000  |
| CTCF                     | 16                                             | 38400001  | 90338345  |
| CTNNB1                   | 3                                              | 2800001   | 79800000  |
| EGFR                     | 7                                              | 1         | 159345973 |
| EP300                    | 22                                             | 17400001  | 50818468  |
| ERBB4                    | 2                                              | 196600001 | 242193529 |
| EZH2                     | 7                                              | 1         | 159345973 |
| FBXW7                    | 4                                              | 97900001  | 190214555 |
| FLT3                     | 13                                             | 27200001  | 28300000  |
| GATA3                    | 10                                             | 3800001   | 17300000  |
| KDM6A                    | N/A (No genes/regions were excluded)           |           |           |
| KEAP1                    | N/A (No genes/regions were excluded)           |           |           |
| KIT                      | 4                                              | 48200001  | 145900000 |
| KRAS                     | N/A (Only SNVs/INDELs were used for this gene) |           |           |
| MAP3K1                   | 5                                              | 1         | 93000000  |
| MECOM                    | 3                                              | 100300001 | 198295559 |
| MTOR                     | 1                                              | 1         | 115500000 |
| NCOR1                    | 17                                             | 1         | 22700000  |
| NF1                      | 17                                             | 27400001  | 83257441  |
| NFE2L2                   | 2                                              | 118100001 | 242193529 |
| NOTCH1                   | 9                                              | 1         | 138394717 |
| NRAS                     | 1                                              | 1         | 115500000 |
| NSD1                     | 5                                              | 1         | 181538259 |
| PBRM1                    | 3                                              | 4000001   | 79800000  |
| PDGFRA                   | N/A (No genes/regions were excluded)           |           |           |
| PIK3CA                   | 3                                              | 100300001 | 198295559 |
| PIK3R1                   | 5                                              | 1         | 181538259 |
| POLQ                     | 3                                              | 100300001 | 198295559 |
| PTEN                     | 10                                             | 68800001  | 133797422 |
| RB1                      | 13                                             | 18900001  | 61800000  |
| SETBP1                   | 18                                             | 21500001  | 80373285  |
| SETD2                    | 3                                              | 2800001   | 79800000  |
| SF3B1                    | N/A (No genes/regions were excluded)           |           |           |
| SMAD4                    | 18                                             | 8500001   | 80373285  |
| SPOP                     | 17                                             | 1         | 83257441  |

|       |                                                |          |           |
|-------|------------------------------------------------|----------|-----------|
| STAG2 | N/A (No genes/regions were excluded)           |          |           |
| TET2  | 4                                              | 87100001 | 186200000 |
| TP53  | N/A (Only SNVs/INDELs were used for this gene) |          |           |

Table S24. List of top genes in classification of APC alterations, their importance scores, and retrieved associations with APC

| Gene                             | Score  | Known Associations with APC                                                                                                  | Ref   |
|----------------------------------|--------|------------------------------------------------------------------------------------------------------------------------------|-------|
| LY6G6F-LY6G6D<br>ENSG00000250641 | 0.0119 | LY6G6D is an antigen that is overexpressed in MSS CRCs when compared to other solid tumours                                  | 28    |
| RNF43<br>ENSG00000108375         | 0.0097 | Genetic inactivation or reduced RNA levels of this gene is observed in APC wild-type CRCs                                    | 29    |
| CEL<br>ENSG00000170835           | 0.0071 | Not known                                                                                                                    |       |
| POU5F1B<br>ENSG00000212993       | 0.0071 | Wnt/beta-catenin was shown to be associated with this gene                                                                   | 30,31 |
| LY6G6D<br>ENSG00000244355        | 0.0067 | LY6G6D is an antigen that is overexpressed in MSS CRCs when compared to other solid tumours                                  | 28    |
| ASCL2<br>ENSG00000183734         | 0.0062 | A transcription factor that is regulated by Wnt signal                                                                       | 32    |
| AC124067.4<br>ENSG00000254290    | 0.0061 | lncRNA that was shown to have some role in tumor microenvironment infiltration, cancer stemness, and drug resistance in COAD | 33    |
| PLAGL2<br>ENSG00000126003        | 0.0057 | Its overexpression was shown to downregulate APC, while its knockdown led to APC upregulation                                | 34    |
| PLA2G12B<br>ENSG00000138308      | 0.0054 | Not known                                                                                                                    |       |
| AXIN2<br>ENSG00000168646         | 0.0049 | Degrades Beta-catenin in Wnt Signalling pathway and forms a protein complex with APC                                         | 35    |
| DPEP1<br>ENSG00000015413         | 0.0046 | Not known                                                                                                                    |       |
| ZNRF3<br>ENSG00000183579         | 0.0045 | Is inactivated in APC wild-type CRCs as an alternate mechanism to activate Wnt signalling pathway                            | 36    |
| RUBCNL<br>ENSG00000102445        | 0.0042 | Not known                                                                                                                    |       |
| SLC5A6<br>ENSG00000138074        | 0.0040 | Not known                                                                                                                    |       |
| SPACA3<br>ENSG00000141316        | 0.0040 | Not known                                                                                                                    |       |

Table S25. List of top genes in classification of ARID1A alterations, their importance scores, and retrieved associations with ARID1A

| Gene                       | Score  | Known Associations with ARID1A                                          | Ref |
|----------------------------|--------|-------------------------------------------------------------------------|-----|
| RPL22L1<br>ENSG00000163584 | 0.0257 | ARID1A mutant tumours were shown to be genetically dependent to RPL22L1 | 37  |

|                                |        |                                                                                                                                                                                                 |       |
|--------------------------------|--------|-------------------------------------------------------------------------------------------------------------------------------------------------------------------------------------------------|-------|
| HMG2P5<br>ENSG00000234664      | 0.0134 | Not known                                                                                                                                                                                       |       |
| TRIM67<br>ENSG00000119283      | 0.0111 | Not known                                                                                                                                                                                       |       |
| KCNIP2<br>ENSG00000120049      | 0.0100 | Not known                                                                                                                                                                                       |       |
| RUNDC3A-AS1<br>ENSG00000267750 | 0.0096 | Not known                                                                                                                                                                                       |       |
| AL109810.2<br>ENSG00000235710  | 0.0087 | Not known                                                                                                                                                                                       |       |
| AC068057.2<br>ENSG00000228528  | 0.0067 | Not known                                                                                                                                                                                       |       |
| AC005740.1<br>ENSG00000226040  | 0.0067 | Not known                                                                                                                                                                                       |       |
| NFATC1<br>ENSG00000131196      | 0.0060 | Is a downstream target of ARID1A which is activated by it. Also, plays important transcriptional roles in absence of ARID1A. Its overexpression leads to dissociation of ARID1A from the genome | 38,39 |
| TMEM147<br>ENSG00000105677     | 0.0059 | Not known                                                                                                                                                                                       |       |
| DRG2<br>ENSG00000108591        | 0.0058 | Not known                                                                                                                                                                                       |       |
| ATCAY<br>ENSG00000167654       | 0.0053 | Not known                                                                                                                                                                                       |       |
| AC124798.1<br>ENSG00000260196  | 0.0053 | Not known                                                                                                                                                                                       |       |
| CLVS1<br>ENSG00000177182       | 0.0044 | Not known                                                                                                                                                                                       |       |
| PAX5<br>ENSG00000196092        | 0.0043 | Not known                                                                                                                                                                                       |       |

Table S26. List of top genes in classification of ATR alterations, their importance scores, and retrieved associations with ATR

| Gene                      | Score  | Known Associations with ATR                                                                                                                                     | Ref   |
|---------------------------|--------|-----------------------------------------------------------------------------------------------------------------------------------------------------------------|-------|
| TFG<br>ENSG00000114354    | 0.0124 | Not known                                                                                                                                                       |       |
| FAM83D<br>ENSG00000101447 | 0.0067 | Not known                                                                                                                                                       |       |
| UBE2C<br>ENSG00000175063  | 0.0067 | Its expression has a strong negative correlation with ATR expression. Also, it regulates PER1 which interacts with ATR as a negative regulator of cell division | 40,41 |
| MYBL2<br>ENSG00000101057  | 0.0065 | Interacts with ATR to exit from S phase into G2 during cell division                                                                                            | 42    |
| CDC20<br>ENSG00000117399  | 0.0063 | Not known                                                                                                                                                       |       |
| CKS1B<br>ENSG00000173207  | 0.0058 | Not known                                                                                                                                                       |       |

|                              |        |                                                                                                 |    |
|------------------------------|--------|-------------------------------------------------------------------------------------------------|----|
| TUBA1C<br>ENSG00000167553    | 0.0056 | Not known                                                                                       |    |
| TROAP<br>ENSG00000135451     | 0.0054 | Not known                                                                                       |    |
| LINC01633<br>ENSG00000260976 | 0.0052 | Not known                                                                                       |    |
| ACAA1<br>ENSG00000060971     | 0.0051 | Was shown to be negatively correlated with ATR in lung cancer                                   | 43 |
| AURKA<br>ENSG00000087586     | 0.0051 | Its overexpression was shown to be associated with downregulation of ATR in colon cancer        | 44 |
| CENPA<br>ENSG00000115163     | 0.0048 | It was shown that ATR is needed for proper localization of the proteins produced by this gene   | 45 |
| TRIP13<br>ENSG00000071539    | 0.0045 | Its knockdown is associated with increased p53 phosphorylation which is a primary target of ATR | 46 |
| BIRC5<br>ENSG00000089685     | 0.0040 | Not known                                                                                       |    |
| TMEM189<br>ENSG00000240849   | 0.0040 | Not known                                                                                       |    |

Table S27. List of top genes in classification of ATRX alterations, their importance scores, and retrieved associations with ATRX

| Gene                          | Score  | Known Associations with ATRX                                                                    | Ref |
|-------------------------------|--------|-------------------------------------------------------------------------------------------------|-----|
| DRG2<br>ENSG00000108591       | 0.0519 | In IDH-mutant gliomas, high mutation rate of ATRX and downregulation of DRG2 have been observed | 47  |
| AC068057.2<br>ENSG00000228528 | 0.0394 | Not known                                                                                       |     |
| EDA2R<br>ENSG00000131080      | 0.0343 | Not known                                                                                       |     |
| OR4N2<br>ENSG00000176294      | 0.0317 | Not known                                                                                       |     |
| OR4K6P<br>ENSG00000228304     | 0.0292 | Not known                                                                                       |     |
| TERT<br>ENSG00000164362       | 0.0279 | It is significantly downregulated with partial loss of ATRX activity                            | 48  |
| TRIP4<br>ENSG00000103671      | 0.0190 | Not known                                                                                       |     |
| DEFB119<br>ENSG00000180483    | 0.0183 | Not known                                                                                       |     |
| TPTEP1<br>ENSG00000100181     | 0.0182 | Not known                                                                                       |     |
| GRPEL2<br>ENSG00000164284     | 0.0181 | Not known                                                                                       |     |
| FDXR<br>ENSG00000161513       | 0.0156 | Mutations in ATRX were shown to be positively associated with FDXR expression                   | 49  |
| STOX1<br>ENSG00000165730      | 0.0143 | Not known                                                                                       |     |
| PTCHD4<br>ENSG00000244694     | 0.0129 | Not known                                                                                       |     |

|                             |        |           |  |
|-----------------------------|--------|-----------|--|
| REM1<br>ENSG00000088320     | 0.0120 | Not known |  |
| CD81-AS1<br>ENSG00000238184 | 0.0111 | Not known |  |

Table S28. List of top genes in classification of BRAF alterations, their importance scores, and retrieved associations with BRAF

| Gene                       | Score  | Known Associations with BRAF                                                                                                 | Ref   |
|----------------------------|--------|------------------------------------------------------------------------------------------------------------------------------|-------|
| DCSTAMP<br>ENSG00000164935 | 0.0364 | Is overexpressed in presence of BRAF mutations in thyroid cancer                                                             | 50,51 |
| TMPRSS6<br>ENSG00000187045 | 0.0262 | Is overexpressed in presence of BRAF mutations in thyroid cancer                                                             | 52    |
| NECTIN4<br>ENSG00000143217 | 0.0214 | Is overexpressed in presence of BRAF mutations in melanoma                                                                   | 53    |
| ERBB3<br>ENSG00000065361   | 0.0166 | Is one of the most potent activators of AKT pathway and a key factor in development of resistance to BRAF and MEK inhibitors | 54    |
| KLK10<br>ENSG00000129451   | 0.0163 | Is hypomethylated in thyroid tumours with mutated BRAF                                                                       | 55    |
| PNPLA5<br>ENSG00000100341  | 0.0154 | Not known                                                                                                                    |       |
| PDLIM4<br>ENSG00000131435  | 0.0149 | Is overexpressed in presence of BRAF mutations in thyroid cancer                                                             | 56    |
| EPHA10<br>ENSG00000183317  | 0.0142 | Is significantly downregulated in thyroid tumours with wild-type BRAF                                                        | 51    |
| KLK7<br>ENSG00000169035    | 0.0117 | Is overexpressed in presence of BRAF mutations in thyroid cancer                                                             | 57    |
| TACSTD2<br>ENSG00000184292 | 0.0103 | Is overexpressed in presence of BRAF mutations in thyroid cancer                                                             | 58    |
| FN1<br>ENSG00000115414     | 0.0102 | Is differentially expressed between BRAF-wt and BRAF-mut samples in thyroid cancer                                           | 59    |
| LAD1<br>ENSG00000159166    | 0.0097 | Is induced by BRAF V600E in thyroid cancer                                                                                   | 56    |
| CRLF2<br>ENSG00000205755   | 0.0094 | Not known                                                                                                                    |       |
| SYT12<br>ENSG00000173227   | 0.0091 | It is associated with BRAF mutated thyroid tumours                                                                           | 60    |
| SLC34A2<br>ENSG00000157765 | 0.0074 | Is overexpressed in BRAF mutant and underexpressed in BRAF wild-type thyroid tumours                                         | 51,61 |

Table S29. List of top genes in classification of BRCA1 alterations, their importance scores, and retrieved associations with BRCA1

| Gene                     | Score  | Known Associations with BRCA1                                                                 | Ref   |
|--------------------------|--------|-----------------------------------------------------------------------------------------------|-------|
| TBRG4<br>ENSG00000136270 | 0.0142 | Is a regulator of TGF-beta which interacts with BRCA1 and can block or enhance BRCA1 activity | 62,63 |

|                              |        |                                                                                                                                        |       |
|------------------------------|--------|----------------------------------------------------------------------------------------------------------------------------------------|-------|
| CGNL1<br>ENSG00000128849     | 0.0055 | Not known                                                                                                                              |       |
| CHCHD7<br>ENSG00000170791    | 0.0046 | Not known                                                                                                                              |       |
| NQO1<br>ENSG00000181019      | 0.0043 | BRCA1 knockdown was shown to decrease NQO1 expression. Also, NRF2 was shown to interact with BRCA1 which is a direct regulator of NQO1 | 64,65 |
| TSKU<br>ENSG00000182704      | 0.0040 | Not known                                                                                                                              |       |
| BLNK<br>ENSG00000095585      | 0.0039 | Is downregulated in absence of BRCA1                                                                                                   | 66    |
| MAP6<br>ENSG00000171533      | 0.0037 | Not known                                                                                                                              |       |
| CCNG1<br>ENSG00000113328     | 0.0036 | Not known                                                                                                                              |       |
| ABHD11<br>ENSG00000106077    | 0.0035 | Not known                                                                                                                              |       |
| NSUN5<br>ENSG00000130305     | 0.0035 | Not known                                                                                                                              |       |
| PDCD4<br>ENSG00000150593     | 0.0032 | Not known                                                                                                                              |       |
| PNMA3<br>ENSG00000183837     | 0.0028 | Not known                                                                                                                              |       |
| NDUFB4P11<br>ENSG00000259374 | 0.0026 | Not known                                                                                                                              |       |

Table S30. List of top genes in classification of CDH1 alterations, their importance scores, and retrieved associations with CDH1

| Gene                       | Score  | Known Associations with CDH1                                                                                             | Ref   |
|----------------------------|--------|--------------------------------------------------------------------------------------------------------------------------|-------|
| IGF2BP1<br>ENSG00000159217 | 0.0041 | Frequently interacts with CDH1. Also, it leads to overexpression of LEF1 and SNAI2 which are negative regulators of CDH1 | 67,68 |
| CIRBP<br>ENSG00000099622   | 0.0033 | Not known                                                                                                                |       |
| ABTB3<br>ENSG00000151136   | 0.0027 | Not known                                                                                                                |       |
| IQGAP3<br>ENSG00000183856  | 0.0026 | Not known, but there are some associations between CDH1 and IQGAP1 and IQGAP2                                            | 69,70 |
| SYTL1<br>ENSG00000142765   | 0.0023 | Not known                                                                                                                |       |
| JMJD7<br>ENSG00000243789   | 0.0023 | Not known                                                                                                                |       |
| EDN3<br>ENSG00000124205    | 0.0022 | Not known                                                                                                                |       |
| SPATA18<br>ENSG00000163071 | 0.0022 | Not known                                                                                                                |       |
| ENTREP1<br>ENSG00000135063 | 0.0020 | Not known                                                                                                                |       |

|                          |        |                                               |    |
|--------------------------|--------|-----------------------------------------------|----|
| CNIH4<br>ENSG00000143771 | 0.0019 | Not known                                     |    |
| PDCD4<br>ENSG00000150593 | 0.0018 | Its knockdown leads to downregulation of CDH1 | 71 |

Table S31. List of top genes in classification of CDKN2A alterations, their importance scores, and retrieved associations with CDKN2A

| Gene                         | Score  | Known Associations with CDKN2A                                                                       | Ref |
|------------------------------|--------|------------------------------------------------------------------------------------------------------|-----|
| UBE2C<br>ENSG00000175063     | 0.0086 | High expression of this gene is positively correlated with CDKN2A expression                         | 72  |
| TROAP<br>ENSG00000135451     | 0.0080 | Not known                                                                                            |     |
| TPX2<br>ENSG00000088325      | 0.0079 | Not known                                                                                            |     |
| PLK1<br>ENSG00000166851      | 0.0075 | In breast tumours with high levels of PLK1, CDKN2A was observed to be upregulated                    | 73  |
| BIRC5<br>ENSG00000089685     | 0.0074 | In oral squamous cells carcinoma, it was observed that CDKN2A is highly involved in BIRC5 expression | 74  |
| CENPA<br>ENSG00000115163     | 0.0072 | Not known                                                                                            |     |
| NEK2<br>ENSG00000117650      | 0.0066 | Not known                                                                                            |     |
| MYBL2<br>ENSG00000101057     | 0.0063 | Not known                                                                                            |     |
| AURKA<br>ENSG00000087586     | 0.0062 | Is upregulated when CDKN2A is inhibited                                                              | 75  |
| AURKB<br>ENSG00000178999     | 0.0058 | Is downregulated when CDKN2A is expressed                                                            | 76  |
| CDCA8<br>ENSG00000134690     | 0.0056 | Is upregulated when CDKN2A is inhibited                                                              | 75  |
| CDC20<br>ENSG00000117399     | 0.0056 | Its expression is positively correlated with CDKN2A expression                                       | 77  |
| ZFPM2-AS1<br>ENSG00000251003 | 0.0050 | Not known                                                                                            |     |
| CDC25C<br>ENSG00000158402    | 0.0047 | Not known                                                                                            |     |
| KIF20A<br>ENSG00000112984    | 0.0047 | Not known                                                                                            |     |

Table S32. List of top genes in classification of CTCF alterations, their importance scores, and retrieved associations with CTCF

| Gene                     | Score  | Known Associations with CTCF | Ref |
|--------------------------|--------|------------------------------|-----|
| NEK2<br>ENSG00000117650  | 0.0036 | Not known                    |     |
| POC1A<br>ENSG00000164087 | 0.0035 | Not known                    |     |

|                            |        |                                                                                           |       |
|----------------------------|--------|-------------------------------------------------------------------------------------------|-------|
| AURKA<br>ENSG00000087586   | 0.0033 | Its expression is positively regulated by CTCF mediated by FOXM1                          | 78    |
| CKS1B<br>ENSG00000173207   | 0.0032 | Not known                                                                                 |       |
| CDC25C<br>ENSG00000158402  | 0.0031 | Is activated by PLK1 which is phosphorylated by AURKA (associated with CTCF as mentioned) | 79,80 |
| GPRASP1<br>ENSG00000198932 | 0.0029 | Not known                                                                                 |       |
| CCNB1<br>ENSG00000134057   | 0.0025 | Is activated by PLK1 which is phosphorylated by AURKA (associated with CTCF as mentioned) | 78    |
| PKMP3<br>ENSG00000220563   | 0.0024 | Not known                                                                                 |       |
| EARS2<br>ENSG00000103356   | 0.0023 | Not known                                                                                 |       |
| AGAP2<br>ENSG00000135439   | 0.0022 | Not known                                                                                 |       |
| RPL39L<br>ENSG00000163923  | 0.0020 | Not known                                                                                 |       |
| SNRPN<br>ENSG00000128739   | 0.0020 | CTCF binding seems to have a role in regulation of SNRPN as a part of imprinting process  | 81    |
| TK1<br>ENSG00000167900     | 0.0019 | Not known                                                                                 |       |
| ZNF154<br>ENSG00000179909  | 0.0017 | Not known                                                                                 |       |
| KIF20A<br>ENSG00000112984  | 0.0017 | Not known                                                                                 |       |

Table S33. List of top genes in classification of CTNNB1 alterations, their importance scores, and retrieved associations with CTNNB1

| Gene                       | Score  | Known Associations with CTNNB1                                                             | Ref |
|----------------------------|--------|--------------------------------------------------------------------------------------------|-----|
| RPSA2<br>ENSG00000225178   | 0.0197 | Not known                                                                                  |     |
| MORC2<br>ENSG00000133422   | 0.0110 | It positively regulates CTNNB1 expression and Beta-catenin signaling pathway               | 82  |
| RPL14P1<br>ENSG00000139239 | 0.0087 | Not known                                                                                  |     |
| IPO9<br>ENSG00000198700    | 0.0068 | Not known                                                                                  |     |
| ABCB6<br>ENSG00000115657   | 0.0052 | Its depletion was shown to decrease CTNNB1 expression                                      | 83  |
| RPL15P3<br>ENSG00000212802 | 0.0051 | Not known                                                                                  |     |
| C3orf38<br>ENSG00000179021 | 0.0044 | Not known                                                                                  |     |
| PANX2<br>ENSG00000073150   | 0.0042 | Not known, but overexpression of PANX1 was shown to be correlated with CTNNB1 upregulation | 84  |
| MSL3B<br>ENSG00000224287   | 0.0037 | Not known                                                                                  |     |

|                              |        |                                                                                                              |    |
|------------------------------|--------|--------------------------------------------------------------------------------------------------------------|----|
| TTYH3<br>ENSG00000136295     | 0.0037 | Its overexpression was shown to be associated with upregulation of CTNNB1 and Beta-catenin signaling pathway | 85 |
| CLPTM1L<br>ENSG00000049656   | 0.0035 | Not known                                                                                                    |    |
| SLC35B1<br>ENSG00000121073   | 0.0033 | Not known                                                                                                    |    |
| JAG2<br>ENSG00000184916      | 0.0032 | Not known                                                                                                    |    |
| PCGF1<br>ENSG00000115289     | 0.0030 | Overexpression of Hoxa9, a direct target of PCGF1, was shown to be associated with upregulation of CTNNB1    | 86 |
| KRT10-AS1<br>ENSG00000167920 | 0.0030 | Not known                                                                                                    |    |

Table S34. List of top genes in classification of EGFR alterations, their importance scores, and retrieved associations with EGFR

| Gene                          | Score  | Known Associations with EGFR                                                                              | Ref   |
|-------------------------------|--------|-----------------------------------------------------------------------------------------------------------|-------|
| OPN3<br>ENSG00000054277       | 0.0061 | Not known                                                                                                 |       |
| GALNT3<br>ENSG00000115339     | 0.0052 | Its knockdown was shown to alter EGFR glycosylation which can lead to increased activation                | 87    |
| MIR9-3HG<br>ENSG00000255571   | 0.0049 | Not known                                                                                                 |       |
| SH2D4A<br>ENSG00000104611     | 0.0049 | Not known                                                                                                 |       |
| IGF2BP2<br>ENSG00000073792    | 0.0045 | EGFR expression was shown to be positively associated with IGF2BP2                                        | 88,89 |
| SNHG11<br>ENSG00000174365     | 0.0043 | Not known                                                                                                 |       |
| KLRC4<br>ENSG00000183542      | 0.0040 | Not known                                                                                                 |       |
| ERGIC3<br>ENSG00000125991     | 0.0035 | Not known                                                                                                 |       |
| FNDC11<br>ENSG00000125531     | 0.0032 | Not known                                                                                                 |       |
| CD58<br>ENSG00000116815       | 0.0030 | Not known                                                                                                 |       |
| F11R<br>ENSG00000158769       | 0.0030 | Not known                                                                                                 |       |
| AC068775.1<br>ENSG00000255641 | 0.0028 | Not known                                                                                                 |       |
| KLRC3<br>ENSG00000205810      | 0.0027 | Not known                                                                                                 |       |
| LINC02253<br>ENSG00000259485  | 0.0025 | Not known                                                                                                 |       |
| SMOC1<br>ENSG00000198732      | 0.0025 | Is downregulated in presence of EGFR 19Del mutation and is upregulated in presence of EGFR L858R mutation | 90    |

Table S35. List of top genes in classification of EZH2 alterations, their importance scores, and retrieved associations with EZH2

| Gene                         | Score  | Known Associations with EZH2                                                                           | Ref |
|------------------------------|--------|--------------------------------------------------------------------------------------------------------|-----|
| TMEM54<br>ENSG00000121900    | 0.0086 | Not known                                                                                              |     |
| SNHG18<br>ENSG00000250786    | 0.0065 | Not known                                                                                              |     |
| VAV3<br>ENSG00000134215      | 0.0046 | Its expression was shown to be associated with EZH2 mutational status                                  | 91  |
| LRRC36<br>ENSG00000159708    | 0.0041 | Not known                                                                                              |     |
| KCNK5<br>ENSG00000164626     | 0.0039 | Not known                                                                                              |     |
| GSS<br>ENSG00000100983       | 0.0035 | Not known                                                                                              |     |
| GPR27<br>ENSG00000170837     | 0.0034 | Not known                                                                                              |     |
| KIF9<br>ENSG00000088727      | 0.0030 | Not known                                                                                              |     |
| DPEP1<br>ENSG00000015413     | 0.0028 | Not known                                                                                              |     |
| UBAC2<br>ENSG00000134882     | 0.0026 | Not known                                                                                              |     |
| PHETA2<br>ENSG00000177096    | 0.0025 | Not known                                                                                              |     |
| HNF4G<br>ENSG00000164749     | 0.0025 | Transcriptionally activates lncRNA-DAW which directly interacts with EZH2 and leads to its degradation | 92  |
| C3orf85<br>ENSG00000241224   | 0.0024 | Not known                                                                                              |     |
| TMT1B<br>ENSG00000170439     | 0.0023 | Not known                                                                                              |     |
| TNFRSF11B<br>ENSG00000164761 | 0.0021 | Not known                                                                                              |     |

Table S36. List of top genes in classification of FBXW7 alterations, their importance scores, and retrieved associations with FBXW7

| Gene                      | Score  | Known Associations with FBXW7                                          | Ref   |
|---------------------------|--------|------------------------------------------------------------------------|-------|
| MYBL2<br>ENSG00000101057  | 0.0050 | Not known                                                              |       |
| UBE2C<br>ENSG00000175063  | 0.0048 | Not known                                                              |       |
| AURKA<br>ENSG00000087586  | 0.0047 | Is negatively regulated and can be degraded by FBXW7                   | 93,94 |
| TRIP13<br>ENSG00000071539 | 0.0046 | Directly binds to the promoter of FBXW7 and inhibits its transcription | 95,96 |
| ALG3<br>ENSG00000214160   | 0.0042 | Not known                                                              |       |

|                             |        |                                                                                                                                                                      |        |
|-----------------------------|--------|----------------------------------------------------------------------------------------------------------------------------------------------------------------------|--------|
| MTFR2<br>ENSG00000146410    | 0.0041 | Not known                                                                                                                                                            |        |
| TROAP<br>ENSG00000135451    | 0.0041 | Not known                                                                                                                                                            |        |
| FAM83D<br>ENSG00000101447   | 0.0040 | Directly binds to FBXW7 and downregulates its expression                                                                                                             | 97,98  |
| TTK<br>ENSG00000112742      | 0.0039 | FBXW7-deficient cells were shown to be vulnerable to TTK knockdown. Also, loss of FBXW7 was demonstrated to increase ANXA2 expression which regulates TTK expression | 99,100 |
| TPX2<br>ENSG00000088325     | 0.0035 | Not known                                                                                                                                                            |        |
| NUF2<br>ENSG00000143228     | 0.0031 | Was shown to be upregulated when FBXW7 was silenced                                                                                                                  | 101    |
| NEK2<br>ENSG00000117650     | 0.0031 | Is negatively regulated by circ-FBXW7 (FBXW7 circular RNA)                                                                                                           | 102    |
| TMEM229B<br>ENSG00000198133 | 0.0030 | Not known                                                                                                                                                            |        |
| NUDT9<br>ENSG00000170502    | 0.0027 | Not known                                                                                                                                                            |        |
| CENPA<br>ENSG00000115163    | 0.0027 | FBXW7 loss of function leads to phosphorylation of CENPA and its reduced level at centromeres                                                                        | 103    |

Table S37. List of top genes in classification of GATA3 alterations, their importance scores, and retrieved associations with GATA3

| Gene                     | Score  | Known Associations with GATA3                                                                                                                              | Ref         |
|--------------------------|--------|------------------------------------------------------------------------------------------------------------------------------------------------------------|-------------|
| AURKA<br>ENSG00000087586 | 0.0065 | GATA3 binds to its promoter and positively regulates it                                                                                                    | 104         |
| UBE2C<br>ENSG00000175063 | 0.0062 | Its expression was shown to be positively correlated with GATA3                                                                                            | 105         |
| CENPA<br>ENSG00000115163 | 0.0058 | Not known                                                                                                                                                  |             |
| CDC20<br>ENSG00000117399 | 0.0052 | It has been shown that GATA3 mutations are associated with downregulation of CDC20 and GATA3 expression is negatively associated with CDC20 overexpression | 106         |
| TPX2<br>ENSG00000088325  | 0.0050 | Not known                                                                                                                                                  |             |
| NEK2<br>ENSG00000117650  | 0.0049 | Not known                                                                                                                                                  |             |
| NUF2<br>ENSG00000143228  | 0.0041 | Its expression was shown to be positively correlated with GATA3                                                                                            | 107,<br>108 |
| BIRC5<br>ENSG00000089685 | 0.0041 | Not known                                                                                                                                                  |             |
| ARMH3<br>ENSG00000120029 | 0.0038 | Not known                                                                                                                                                  |             |
| CDCA8<br>ENSG00000134690 | 0.0037 | Was shown to be a target of GATA3 and to be regulated by it                                                                                                | 109         |

|                           |        |           |  |
|---------------------------|--------|-----------|--|
| KIF2C<br>ENSG00000142945  | 0.0036 | Not known |  |
| TRIP13<br>ENSG00000071539 | 0.0031 | Not known |  |
| KIF4A<br>ENSG00000090889  | 0.0029 | Not known |  |
| SGO1<br>ENSG00000129810   | 0.0029 | Not known |  |
| MYBL2<br>ENSG00000101057  | 0.0026 | Not known |  |

Table S38. List of top genes in classification of KDM6A alterations, their importance scores, and retrieved associations with KDM6A

| Gene                            | Score  | Known Associations with KDM6A | Ref |
|---------------------------------|--------|-------------------------------|-----|
| ABCF3<br>ENSG00000161204        | 0.0066 | Not known                     |     |
| ACAD9<br>ENSG00000177646        | 0.0058 | Not known                     |     |
| EPB41L4A-AS1<br>ENSG00000224032 | 0.0050 | Not known                     |     |
| TIMMDC1<br>ENSG00000113845      | 0.0048 | Not known                     |     |
| MRPS22<br>ENSG00000175110       | 0.0040 | Not known                     |     |
| EEF2<br>ENSG00000167658         | 0.0038 | Not known                     |     |
| SNHG8<br>ENSG00000269893        | 0.0038 | Not known                     |     |
| RGS3<br>ENSG00000138835         | 0.0035 | Not known                     |     |
| MIX23<br>ENSG00000160124        | 0.0035 | Not known                     |     |
| EEF1A1<br>ENSG00000156508       | 0.0035 | Not known                     |     |
| TUFM<br>ENSG00000178952         | 0.0034 | Not known                     |     |
| ALG3<br>ENSG00000214160         | 0.0034 | Not known                     |     |
| CLCN2<br>ENSG00000114859        | 0.0033 | Not known                     |     |
| PNMA3<br>ENSG00000183837        | 0.0028 | Not known                     |     |
| LSG1<br>ENSG00000041802         | 0.0027 | Not known                     |     |

Table S39. List of top genes in classification of KEAP1 alterations, their importance scores, and retrieved associations with KEAP1

| Gene                        | Score  | Known Associations with KEAP1                                                                                                                                            | Ref         |
|-----------------------------|--------|--------------------------------------------------------------------------------------------------------------------------------------------------------------------------|-------------|
| DIRAS3<br>ENSG00000162595   | 0.0161 | Its expression was shown to be associated with KEAP1 accumulation                                                                                                        | 110         |
| AHNAK2<br>ENSG00000185567   | 0.0153 | Not known                                                                                                                                                                |             |
| PRSS2<br>ENSG00000275896    | 0.0126 | Not known                                                                                                                                                                |             |
| PTPRE<br>ENSG00000132334    | 0.0121 | Not known                                                                                                                                                                |             |
| MFG8<br>ENSG00000140545     | 0.0118 | Upregulates NRF2 activation and NRF2 is a direct target of KEAP1                                                                                                         | 111         |
| PPP1R1B<br>ENSG00000131771  | 0.0116 | Knockdown of NRF2 (target of KEAP1) was shown to be associated with PPP1R1B downregulation                                                                               | 112         |
| PROS1<br>ENSG00000184500    | 0.0111 | Not known                                                                                                                                                                |             |
| MRPS12<br>ENSG00000128626   | 0.0097 | Not known                                                                                                                                                                |             |
| ERFE<br>ENSG00000178752     | 0.0095 | It was shown to be downregulated in NRF2 (target of KEAP1) deficient mice                                                                                                | 113         |
| ACSL5<br>ENSG00000197142    | 0.0093 | Not known                                                                                                                                                                |             |
| EIF4A2<br>ENSG00000156976   | 0.0081 | Inactivation of KEAP1 was shown to confer resistance to EIF4A inhibition. Also, NRF2 (target of KEAP1) gene products can improve EIF4A-dependent transcripts translation | 114,<br>115 |
| STXBP2<br>ENSG00000076944   | 0.0081 | Not known                                                                                                                                                                |             |
| SP100<br>ENSG00000067066    | 0.0080 | A component of promyelocytic leukemia-nuclear body which plays a role in regulating NRF2 (target of KEAP1) stability                                                     | 116         |
| PTK2B<br>ENSG00000120899    | 0.0075 | Not known                                                                                                                                                                |             |
| PRICKLE1<br>ENSG00000139174 | 0.0068 | Not known                                                                                                                                                                |             |

Table S40. List of top genes in classification of KIT alterations, their importance scores, and retrieved associations with KIT

| Gene                     | Score  | Known Associations with KIT | Ref |
|--------------------------|--------|-----------------------------|-----|
| TROAP<br>ENSG00000135451 | 0.0063 | Not known                   |     |
| AURKA<br>ENSG00000087586 | 0.0062 | Not known                   |     |
| UBE2C<br>ENSG00000175063 | 0.0055 | Not known                   |     |
| TPX2<br>ENSG00000088325  | 0.0044 | Not known                   |     |
| MTFR2<br>ENSG00000146410 | 0.0040 | Not known                   |     |

|                           |        |                                                                                             |     |
|---------------------------|--------|---------------------------------------------------------------------------------------------|-----|
| MYBL2<br>ENSG00000101057  | 0.0039 | Not known                                                                                   |     |
| TTK<br>ENSG00000112742    | 0.0036 | Not known                                                                                   |     |
| TRIP13<br>ENSG00000071539 | 0.0033 | Not known                                                                                   |     |
| NUF2<br>ENSG00000143228   | 0.0032 | Not known                                                                                   |     |
| GATB<br>ENSG00000059691   | 0.0031 | Not known                                                                                   |     |
| NEK2<br>ENSG00000117650   | 0.0028 | Not known                                                                                   |     |
| BIRC5<br>ENSG00000089685  | 0.0028 | Is highly expressed in KIT D816V mutated cells and confers resistance to TNF in these cells | 117 |
| SKA1<br>ENSG00000154839   | 0.0028 | Not known                                                                                   |     |
| CBR4<br>ENSG00000145439   | 0.0028 | Not known                                                                                   |     |
| FAM83D<br>ENSG00000101447 | 0.0027 | Not known                                                                                   |     |

Table S41. List of top genes in classification of KRAS alterations, their importance scores, and retrieved associations with KRAS

| Gene                          | Score  | Known Associations with KRAS                                                                                                                                                                             | Ref         |
|-------------------------------|--------|----------------------------------------------------------------------------------------------------------------------------------------------------------------------------------------------------------|-------------|
| AC009065.3<br>ENSG00000259933 | 0.0093 | Not known                                                                                                                                                                                                |             |
| BCL2L15<br>ENSG00000188761    | 0.0092 | Was shown to be upregulated in presence of KRAS and PIK3CA mutations and KRAS mutational status was shown to be associated with the diagnostic predictive power of BCL2L15 expression                    | 118         |
| AL049836.1<br>ENSG00000258919 | 0.0091 | Not known                                                                                                                                                                                                |             |
| ERN2<br>ENSG00000134398       | 0.0087 | Not known                                                                                                                                                                                                |             |
| APOBEC1<br>ENSG00000111701    | 0.0079 | Subsets of APOBEC1-edited transcripts encode proteins that play a role in KRAS-related cellular pathways                                                                                                 | 119         |
| GPR35<br>ENSG00000178623      | 0.0079 | Not known                                                                                                                                                                                                |             |
| LINC02086<br>ENSG00000244649  | 0.0073 | Not known                                                                                                                                                                                                |             |
| CEACAM6<br>ENSG00000086548    | 0.0070 | Its overexpression was shown to be associated with KRAS mutations, and knockdown in KRAS mutant samples inhibited tumour growth. Also, it was shown that CEACAM6 is associated with or dependent on KRAS | 120,<br>121 |
| AL355312.4<br>ENSG00000273132 | 0.0059 | Not known                                                                                                                                                                                                |             |
| CLDN10-AS1<br>ENSG00000223392 | 0.0058 | Not known                                                                                                                                                                                                |             |

|                               |        |                                                                                                                                                 |             |
|-------------------------------|--------|-------------------------------------------------------------------------------------------------------------------------------------------------|-------------|
| AC008870.5<br>ENSG00000278912 | 0.0045 | Not known                                                                                                                                       |             |
| MST1R<br>ENSG00000164078      | 0.0044 | In KRAS mutant sample, its expression was shown to mediate tumour growth. Also, it was shown that MST1R is associated with or dependent on KRAS | 121,<br>122 |
| EPS8L3<br>ENSG00000198758     | 0.0040 | Not known                                                                                                                                       |             |
| PPP1R14D<br>ENSG00000166143   | 0.0037 | Not known                                                                                                                                       |             |
| CEACAM5<br>ENSG00000105388    | 0.0035 | Its overexpression was shown to be associated with KRAS mutations                                                                               | 123         |

Table S42. List of top genes in classification of MAP3K1 alterations, their importance scores, and retrieved associations with MAP3K1

| Gene                      | Score  | Known Associations with MAP3K1                                                            | Ref         |
|---------------------------|--------|-------------------------------------------------------------------------------------------|-------------|
| UBE2C<br>ENSG00000175063  | 0.0048 | Not known                                                                                 |             |
| FAM83D<br>ENSG00000101447 | 0.0047 | Not known                                                                                 |             |
| AURKA<br>ENSG00000087586  | 0.0042 | Not known                                                                                 |             |
| NEK2<br>ENSG00000117650   | 0.0039 | Not known                                                                                 |             |
| CENPA<br>ENSG00000115163  | 0.0036 | Not known                                                                                 |             |
| MYBL2<br>ENSG00000101057  | 0.0035 | Not known                                                                                 |             |
| CDC20<br>ENSG00000117399  | 0.0035 | Was shown to be upregulated when MAP3K1 was highly expressed                              | 124         |
| HARS1<br>ENSG00000170445  | 0.0034 | Not known                                                                                 |             |
| CDCA3<br>ENSG00000111665  | 0.0033 | Not known                                                                                 |             |
| TROAP<br>ENSG00000135451  | 0.0032 | Not known                                                                                 |             |
| MTFR2<br>ENSG00000146410  | 0.0032 | Not known                                                                                 |             |
| MED7<br>ENSG00000155868   | 0.0032 | Not known                                                                                 |             |
| CKS1B<br>ENSG00000173207  | 0.0031 | Not known                                                                                 |             |
| CDC25C<br>ENSG00000158402 | 0.0029 | Is downregulated when MAP3K1 is inhibited and upregulated with MAP3K1 is highly expressed | 124,<br>125 |
| BIRC5<br>ENSG00000089685  | 0.0028 | Is downregulated when MAP3K1 is mutated                                                   | 126         |

Table S43. List of top genes in classification of NCOR1 alterations, their importance scores, and retrieved associations with NCOR1

| Gene                      | Score  | Known Associations with NCOR1                                      | Ref         |
|---------------------------|--------|--------------------------------------------------------------------|-------------|
| AURKA<br>ENSG00000087586  | 0.0068 | Not known                                                          |             |
| ALG3<br>ENSG00000214160   | 0.0049 | Not known                                                          |             |
| NEK2<br>ENSG00000117650   | 0.0048 | Not known                                                          |             |
| UBE2C<br>ENSG00000175063  | 0.0048 | Not known                                                          |             |
| TROAP<br>ENSG00000135451  | 0.0048 | Not known                                                          |             |
| CDC20<br>ENSG00000117399  | 0.0043 | Not known                                                          |             |
| CENPA<br>ENSG00000115163  | 0.0037 | Not known                                                          |             |
| MYBL2<br>ENSG00000101057  | 0.0036 | Directly interacts with NCOR1 and is negatively regulated by NCOR1 | 127         |
| CIRBP<br>ENSG00000099622  | 0.0035 | Was shown to interact with NCOR1 to regulate circadian rhythm      | 128,<br>129 |
| CDCA8<br>ENSG00000134690  | 0.0035 | Not known                                                          |             |
| TK1<br>ENSG00000167900    | 0.0035 | Not known                                                          |             |
| RAB5IF<br>ENSG00000101084 | 0.0033 | Not known                                                          |             |
| IQGAP3<br>ENSG00000183856 | 0.0029 | Not known                                                          |             |
| BIRC5<br>ENSG00000089685  | 0.0026 | Not known                                                          |             |
| TPX2<br>ENSG00000088325   | 0.0025 | Not known                                                          |             |

Table S44. List of top genes in classification of NF1 alterations, their importance scores, and retrieved associations with NF1

| Gene                      | Score  | Known Associations with NF1                                                                 | Ref         |
|---------------------------|--------|---------------------------------------------------------------------------------------------|-------------|
| UBE2C<br>ENSG00000175063  | 0.0048 | Not known                                                                                   |             |
| AURKA<br>ENSG00000087586  | 0.0043 | Is overexpressed in NF1 mutant tumour cells                                                 | 130,<br>131 |
| TRIP13<br>ENSG00000071539 | 0.0035 | Not known                                                                                   |             |
| CDC20<br>ENSG00000117399  | 0.0031 | Is overexpressed in NF1 mutant melanoma cells                                               | 132         |
| MYBL2<br>ENSG00000101057  | 0.0030 | In MYBL2 high tumours, higher rate of NF1 downregulation and heterozygous loss was observed | 133         |

|                           |        |           |  |
|---------------------------|--------|-----------|--|
| CENPA<br>ENSG00000115163  | 0.0030 | Not known |  |
| CBX7<br>ENSG00000100307   | 0.0027 | Not known |  |
| UBE2T<br>ENSG00000077152  | 0.0026 | Not known |  |
| TROAP<br>ENSG00000135451  | 0.0025 | Not known |  |
| NEK2<br>ENSG00000117650   | 0.0022 | Not known |  |
| CIRBP<br>ENSG00000099622  | 0.0022 | Not known |  |
| TPX2<br>ENSG00000088325   | 0.0020 | Not known |  |
| KIF2C<br>ENSG00000142945  | 0.0020 | Not known |  |
| CDC48<br>ENSG00000134690  | 0.0020 | Not known |  |
| CDC25C<br>ENSG00000158402 | 0.0018 | Not known |  |

Table S45. List of top genes in classification of NOTCH1 alterations, their importance scores, and retrieved associations with NOTCH1

| Gene                            | Score  | Known Associations with NOTCH1                                                                                      | Ref |
|---------------------------------|--------|---------------------------------------------------------------------------------------------------------------------|-----|
| MICU1<br>ENSG00000107745        | 0.0129 | Not known                                                                                                           |     |
| PPP1R12A-AS1<br>ENSG00000257557 | 0.0123 | Not known                                                                                                           |     |
| PTH1R<br>ENSG00000160801        | 0.0104 | Is PTH receptor, and PTH treatment was shown to affect NOTCH signaling pathway components                           | 134 |
| TCTA<br>ENSG00000145022         | 0.0097 | Not known                                                                                                           |     |
| AC011352.3<br>ENSG00000251320   | 0.0081 | Not known                                                                                                           |     |
| AC011352.1<br>ENSG00000248362   | 0.0075 | Not known                                                                                                           |     |
| MYL3<br>ENSG00000160808         | 0.0073 | Its knockdown was shown to enhance expression of NOTCH related genes and activate NOTCH signaling pathway           | 135 |
| CYB5D2<br>ENSG00000167740       | 0.0068 | Not known                                                                                                           |     |
| MAT1A<br>ENSG00000151224        | 0.0067 | Not known                                                                                                           |     |
| SPRYD4<br>ENSG00000176422       | 0.0067 | Not known                                                                                                           |     |
| SPINK13<br>ENSG00000214510      | 0.0067 | It was shown to be differentially expressed between BCAT1 (a target of NOTCH1) wild-type and BCAT1 knockout samples | 136 |

|                              |        |           |  |
|------------------------------|--------|-----------|--|
| C5orf46<br>ENSG00000178776   | 0.0061 | Not known |  |
| SLC17A1<br>ENSG00000124568   | 0.0060 | Not known |  |
| MOCOS<br>ENSG00000075643     | 0.0055 | Not known |  |
| LINC02609<br>ENSG00000233593 | 0.0054 | Not known |  |

Table S46. List of top genes in classification of NRAS alterations, their importance scores, and retrieved associations with NRAS

| Gene                          | Score  | Known Associations with NRAS | Ref |
|-------------------------------|--------|------------------------------|-----|
| CHGB<br>ENSG00000089199       | 0.0198 | Not known                    |     |
| CCDC146<br>ENSG00000135205    | 0.0163 | Not known                    |     |
| LEFTY2<br>ENSG00000143768     | 0.0129 | Not known                    |     |
| KRT8P30<br>ENSG00000224928    | 0.0127 | Not known                    |     |
| AL031658.2<br>ENSG00000278012 | 0.0124 | Not known                    |     |
| SEZ6L2<br>ENSG00000174938     | 0.0114 | Not known                    |     |
| BCL2L12<br>ENSG00000126453    | 0.0109 | Not known                    |     |
| AC026369.1<br>ENSG00000249695 | 0.0104 | Not known                    |     |
| RIAD1<br>ENSG00000178796      | 0.0102 | Not known                    |     |
| SRRM3<br>ENSG00000177679      | 0.0088 | Not known                    |     |
| COQ8B<br>ENSG00000123815      | 0.0087 | Not known                    |     |
| KCNK3<br>ENSG00000171303      | 0.0086 | Not known                    |     |
| NFATC1<br>ENSG00000131196     | 0.0081 | Not known                    |     |
| LICAM<br>ENSG00000198910      | 0.0080 | Not known                    |     |
| AC012213.4<br>ENSG00000271830 | 0.0079 | Not known                    |     |

Table S47. List of top genes in classification of NSD1 alterations, their importance scores, and retrieved associations with NSD1

| Gene | Score | Known Associations with NSD1 | Ref |
|------|-------|------------------------------|-----|
|------|-------|------------------------------|-----|

|                             |        |           |  |
|-----------------------------|--------|-----------|--|
| CDCA2<br>ENSG00000184661    | 0.0046 | Not known |  |
| UBE2C<br>ENSG00000175063    | 0.0043 | Not known |  |
| CAMK2B<br>ENSG00000058404   | 0.0037 | Not known |  |
| AURKA<br>ENSG00000087586    | 0.0035 | Not known |  |
| CDC20<br>ENSG00000117399    | 0.0034 | Not known |  |
| CENPA<br>ENSG00000115163    | 0.0034 | Not known |  |
| TROAP<br>ENSG00000135451    | 0.0032 | Not known |  |
| CKS1B<br>ENSG00000173207    | 0.0029 | Not known |  |
| MYBL2<br>ENSG00000101057    | 0.0028 | Not known |  |
| ESPL1<br>ENSG00000135476    | 0.0027 | Not known |  |
| MTFR2<br>ENSG00000146410    | 0.0027 | Not known |  |
| TMEM229B<br>ENSG00000198133 | 0.0027 | Not known |  |
| BIRC5<br>ENSG00000089685    | 0.0022 | Not known |  |
| FAM83D<br>ENSG00000101447   | 0.0020 | Not known |  |
| NUSAP1<br>ENSG00000137804   | 0.0018 | Not known |  |

Table S48. List of top genes in classification of PBRM1 alterations, their importance scores, and retrieved associations with PBRM1

| Gene                               | Score  | Known Associations with PBRM1 | Ref |
|------------------------------------|--------|-------------------------------|-----|
| RPSAP58 (RPSA2)<br>ENSG00000225178 | 0.0190 | Not known                     |     |
| MORC2<br>ENSG00000133422           | 0.0117 | Not known                     |     |
| RPL14P1<br>ENSG00000139239         | 0.0101 | Not known                     |     |
| RPSAP54<br>ENSG00000213621         | 0.0075 | Not known                     |     |
| RPSAP19<br>ENSG00000183298         | 0.0066 | Not known                     |     |
| RPL29P26<br>ENSG00000241556        | 0.0062 | Not known                     |     |
| RPL15P3<br>ENSG00000212802         | 0.0054 | Not known                     |     |

|                               |        |           |  |
|-------------------------------|--------|-----------|--|
| RPSAP12<br>ENSG00000240087    | 0.0042 | Not known |  |
| TRNT1<br>ENSG00000072756      | 0.0041 | Not known |  |
| RPL32P18<br>ENSG00000146677   | 0.0036 | Not known |  |
| RPSAP14<br>ENSG00000233984    | 0.0028 | Not known |  |
| ABCB6<br>ENSG00000115657      | 0.0027 | Not known |  |
| PANX2<br>ENSG00000073150      | 0.0027 | Not known |  |
| SNAPC1<br>ENSG00000023608     | 0.0027 | Not known |  |
| AC005538.2<br>ENSG00000279809 | 0.0027 | Not known |  |

Table S49. List of top genes in classification of PIK3CA alterations, their importance scores, and retrieved associations with PIK3CA

| Gene                            | Score  | Known Associations with PIK3CA                                                             | Ref |
|---------------------------------|--------|--------------------------------------------------------------------------------------------|-----|
| ZNF691-DT<br>ENSG00000228192    | 0.0057 | Not known                                                                                  |     |
| APOM<br>ENSG00000204444         | 0.0052 | Not known                                                                                  |     |
| AC012354.1<br>ENSG00000225156   | 0.0039 | Not known                                                                                  |     |
| COMTD1<br>ENSG00000165644       | 0.0036 | Not known                                                                                  |     |
| RNF113A<br>ENSG00000125352      | 0.0035 | Not known                                                                                  |     |
| EPB41L4A-AS1<br>ENSG00000224032 | 0.0034 | Not known                                                                                  |     |
| CCDC87<br>ENSG00000182791       | 0.0034 | Not known                                                                                  |     |
| LINC02332<br>ENSG00000259054    | 0.0030 | Not known                                                                                  |     |
| HCG15<br>ENSG00000227214        | 0.0027 | Not known                                                                                  |     |
| DANCR<br>ENSG00000226950        | 0.0027 | Was shown to positively regulate PIK3CA expression and activate PI3K/AKT signaling pathway | 137 |
| TMEM121<br>ENSG00000184986      | 0.0027 | Not known                                                                                  |     |
| TMEM82<br>ENSG00000162460       | 0.0027 | Not known                                                                                  |     |
| PARP3<br>ENSG00000041880        | 0.0026 | Not known                                                                                  |     |
| RHOD<br>ENSG00000173156         | 0.0024 | Not known                                                                                  |     |

|                           |        |           |  |
|---------------------------|--------|-----------|--|
| VSTM2L<br>ENSG00000132821 | 0.0024 | Not known |  |
|---------------------------|--------|-----------|--|

Table S50. List of top genes in classification of PTEN alterations, their importance scores, and retrieved associations with PTEN

| Gene                          | Score  | Known Associations with PTEN                                                                                                                                                                                | Ref         |
|-------------------------------|--------|-------------------------------------------------------------------------------------------------------------------------------------------------------------------------------------------------------------|-------------|
| CDCA8<br>ENSG00000134690      | 0.0074 | Competes with PTEN for AKT binding which affects CDCA8 expression                                                                                                                                           | 138         |
| AURKA<br>ENSG00000087586      | 0.0074 | Downregulation of PTEN was shown to increase AURKA expression and downregulation of AURKA was shown to increase PTEN expression. It was also shown that phosphorylated AURKA is a downstream target of PTEN | 139         |
| CDC20<br>ENSG00000117399      | 0.0073 | Was shown to physically interact with PTEN in mitotic checkpoint complex                                                                                                                                    | 140         |
| CCNB1<br>ENSG00000134057      | 0.0067 | Knockdown of PTEN was shown to decrease CCNB1 expression                                                                                                                                                    | 141         |
| ANXA5<br>ENSG00000164111      | 0.0066 | Not known                                                                                                                                                                                                   |             |
| RPA3<br>ENSG00000106399       | 0.0066 | RPA was shown to function as a trimer of RPA1, RPA2, and RPA3 which forms a complex with PTEN                                                                                                               | 142,<br>143 |
| AC026401.3<br>ENSG00000280206 | 0.0066 | Not known                                                                                                                                                                                                   |             |
| SHOX2<br>ENSG00000168779      | 0.0065 | Its high expression was shown to be correlated with PTEN mutations                                                                                                                                          | 144         |
| KIF4A<br>ENSG00000090889      | 0.0063 | Its high expression was shown to be associated with PTEN mutations and shallow deletion                                                                                                                     | 145         |
| CCNB2<br>ENSG00000157456      | 0.0057 | Its knockdown was found to decrease PTEN centrosomal levels                                                                                                                                                 | 146         |
| CTHRC1<br>ENSG00000164932     | 0.0047 | Not known                                                                                                                                                                                                   |             |
| GP2<br>ENSG00000169347        | 0.0042 | It was found to be upregulated upon PTEN loss                                                                                                                                                               | 147         |
| ASF1B<br>ENSG00000105011      | 0.0040 | Not known                                                                                                                                                                                                   |             |
| CD58<br>ENSG00000116815       | 0.0039 | Low expression of PTEN was shown to be associated with CD58 downregulation                                                                                                                                  | 148         |
| PIGT<br>ENSG00000124155       | 0.0038 | Not known                                                                                                                                                                                                   |             |

Table S51. List of top genes in classification of RB1 alterations, their importance scores, and retrieved associations with RB1

| Gene                      | Score  | Known Associations with RB1 | Ref |
|---------------------------|--------|-----------------------------|-----|
| FAM83D<br>ENSG00000101447 | 0.0109 | Not known                   |     |

|                           |        |                                                                                                                                                                  |             |
|---------------------------|--------|------------------------------------------------------------------------------------------------------------------------------------------------------------------|-------------|
| AURKA<br>ENSG00000087586  | 0.0084 | RB1 mutant cells were shown to be highly sensitive to AURKA inhibitors, with evidence showing that they rely on elevated AURKA activity for survival             | 149,<br>150 |
| TROAP<br>ENSG00000135451  | 0.0080 | Not known                                                                                                                                                        |             |
| CDC25C<br>ENSG00000158402 | 0.0074 | Not known                                                                                                                                                        |             |
| UBE2C<br>ENSG00000175063  | 0.0074 | Its expression was shown to be negatively correlated with RB1 expression                                                                                         | 151         |
| BIRC5<br>ENSG00000089685  | 0.0062 | RB1 was shown to contribute to the regulation of survivin (encoded by BIRC5) activity and RB1-negative cells were shown to be dependent on survivin for survival | 152,<br>153 |
| NEK2<br>ENSG00000117650   | 0.0058 | Its knockdown was shown to be associated with higher RB1 activity                                                                                                | 154,<br>155 |
| CDCA8<br>ENSG00000134690  | 0.0057 | Its overexpression was shown to be positively correlated with RB1 mutations, and it was shown to be downregulated in response to p53/RB signaling                | 156,<br>157 |
| TPX2<br>ENSG00000088325   | 0.0052 | Not known                                                                                                                                                        |             |
| DEPDC1<br>ENSG00000024526 | 0.0050 | Not known                                                                                                                                                        |             |
| CENPA<br>ENSG00000115163  | 0.0047 | RB knockdown was found to increase CENPA expression                                                                                                              | 158         |
| KIF4A<br>ENSG00000090889  | 0.0047 | Not known                                                                                                                                                        |             |
| SGO1<br>ENSG00000129810   | 0.0039 | Not known                                                                                                                                                        |             |
| DSN1<br>ENSG00000149636   | 0.0036 | Not known                                                                                                                                                        |             |
| CCNB2<br>ENSG00000157456  | 0.0036 | Not known                                                                                                                                                        |             |

Table S52. List of top genes in classification of SETBP1 alterations, their importance scores, and retrieved associations with SETBP1

| Gene                          | Score  | Known Associations with SETBP1 | Ref |
|-------------------------------|--------|--------------------------------|-----|
| SPATA18<br>ENSG00000163071    | 0.0086 | Not known                      |     |
| RPL17P6<br>ENSG00000226084    | 0.0062 | Not known                      |     |
| RPL17P36<br>ENSG00000236058   | 0.0037 | Not known                      |     |
| RPL17P18<br>ENSG00000234742   | 0.0032 | Not known                      |     |
| AL157394.1<br>ENSG00000261438 | 0.0027 | Not known                      |     |
| IL18R1<br>ENSG00000115604     | 0.0025 | Not known                      |     |

|                           |        |           |  |
|---------------------------|--------|-----------|--|
| CELF5<br>ENSG00000161082  | 0.0022 | Not known |  |
| DCAF13<br>ENSG00000164934 | 0.0022 | Not known |  |

Table S53. List of top genes in classification of SETD2 alterations, their importance scores, and retrieved associations with SETD2

| Gene                               | Score  | Known Associations with SETD2 | Ref |
|------------------------------------|--------|-------------------------------|-----|
| RPSAP58 (RPSA2)<br>ENSG00000225178 | 0.0188 | Not known                     |     |
| MORC2<br>ENSG00000133422           | 0.0098 | Not known                     |     |
| RPL15P3<br>ENSG00000212802         | 0.0069 | Not known                     |     |
| IPO9<br>ENSG00000198700            | 0.0052 | Not known                     |     |
| MSL3B<br>ENSG00000224287           | 0.0049 | Not known                     |     |
| RPL14P1<br>ENSG00000139239         | 0.0041 | Not known                     |     |
| CIMAP1C<br>ENSG00000182950         | 0.0039 | Not known                     |     |
| C3orf38<br>ENSG00000179021         | 0.0037 | Not known                     |     |
| PANX2<br>ENSG00000073150           | 0.0036 | Not known                     |     |
| ABCB6<br>ENSG00000115657           | 0.0030 | Not known                     |     |
| RPSAP12<br>ENSG00000240087         | 0.0030 | Not known                     |     |
| RPSAP14<br>ENSG00000233984         | 0.0029 | Not known                     |     |
| AC005538.2<br>ENSG00000279809      | 0.0027 | Not known                     |     |
| KRT10-AS1<br>ENSG00000167920       | 0.0026 | Not known                     |     |
| SLC29A4<br>ENSG00000164638         | 0.0025 | Not known                     |     |

Table S54. List of top genes in classification of SF3B1 alterations, their importance scores, and retrieved associations with SF3B1

| Gene                          | Score  | Known Associations with SF3B1 | Ref |
|-------------------------------|--------|-------------------------------|-----|
| AC022400.8<br>ENSG00000279088 | 0.0211 | Not known                     |     |
| IDUA<br>ENSG00000127415       | 0.0148 | Not known                     |     |

|                               |        |                                                                                        |             |
|-------------------------------|--------|----------------------------------------------------------------------------------------|-------------|
| AP000892.3<br>ENSG00000276505 | 0.0119 | Not known                                                                              |             |
| SRRM5<br>ENSG00000226763      | 0.0088 | It was shown to be overexpressed in presence of SF3B1 mutations                        | 159         |
| FIG4<br>ENSG00000112367       | 0.0086 | Not known                                                                              |             |
| ABCB7<br>ENSG00000131269      | 0.0075 | Mutant SF3B1 was shown to induce missplicing in ABCB7, resulting in reduced expression | 160,<br>161 |
| BX649632.1<br>ENSG00000273249 | 0.0070 | Not known                                                                              |             |
| RNPEPL1<br>ENSG00000142327    | 0.0069 | Was shown to be differentially spliced in presence of SF3B1 mutations                  | 162,<br>163 |
| ZNF576<br>ENSG00000124444     | 0.0056 | Not known                                                                              |             |
| AL158196.1<br>ENSG00000276968 | 0.0054 | Not known                                                                              |             |
| CARD16<br>ENSG00000204397     | 0.0051 | Not known                                                                              |             |
| FAM53B-AS1<br>ENSG00000233334 | 0.0048 | Not known                                                                              |             |
| LINC01637<br>ENSG00000237476  | 0.0047 | Not known                                                                              |             |
| LMAN1<br>ENSG00000074695      | 0.0045 | Not known                                                                              |             |
| BTBD6<br>ENSG00000184887      | 0.0045 | Not known                                                                              |             |

Table S55. List of top genes in classification of SPOP alterations, their importance scores, and retrieved associations with SPOP

| <b>Gene</b>               | <b>Score</b> | <b>Known Associations with SPOP</b>                         | <b>Ref</b> |
|---------------------------|--------------|-------------------------------------------------------------|------------|
| CCNG1<br>ENSG00000113328  | 0.0176       | Not known                                                   |            |
| ATP1B3<br>ENSG00000069849 | 0.0116       | Not known                                                   |            |
| ABHD11<br>ENSG00000106077 | 0.0078       | Not known                                                   |            |
| DUSP15<br>ENSG00000149599 | 0.0070       | Not known                                                   |            |
| RNF40<br>ENSG00000103549  | 0.0058       | Not known, but both RNF40 and SPOP are E3 ubiquitin ligases |            |
| LRRN2<br>ENSG00000170382  | 0.0056       | Not known                                                   |            |
| CALM3<br>ENSG00000160014  | 0.0054       | Not known                                                   |            |
| PTCD1<br>ENSG00000106246  | 0.0052       | Not known                                                   |            |
| TSACC<br>ENSG00000163467  | 0.0046       | Not known                                                   |            |

|                               |        |           |  |
|-------------------------------|--------|-----------|--|
| SORCS2<br>ENSG00000184985     | 0.0043 | Not known |  |
| FAM186B<br>ENSG00000135436    | 0.0041 | Not known |  |
| AC012508.2<br>ENSG00000260634 | 0.0040 | Not known |  |
| DDX19A-DT<br>ENSG00000261777  | 0.0040 | Not known |  |
| MRPS33<br>ENSG00000090263     | 0.0039 | Not known |  |
| TPK1<br>ENSG00000196511       | 0.0039 | Not known |  |

Table S56. List of top genes in classification of STAG2 alterations, their importance scores, and retrieved associations with STAG2

| <b>Gene</b>                   | <b>Score</b> | <b>Known Associations with STAG2</b> | <b>Ref</b> |
|-------------------------------|--------------|--------------------------------------|------------|
| PSMB3P1<br>ENSG00000258907    | 0.0076       | Not known                            |            |
| PLCD1<br>ENSG00000187091      | 0.0056       | Not known                            |            |
| RGS3<br>ENSG00000138835       | 0.0043       | Not known                            |            |
| NINJ1<br>ENSG00000131669      | 0.0042       | Not known                            |            |
| ACAD9<br>ENSG00000177646      | 0.0042       | Not known                            |            |
| ATP2A1<br>ENSG00000196296     | 0.0034       | Not known                            |            |
| KCNMB4<br>ENSG00000135643     | 0.0034       | Not known                            |            |
| TRAIP<br>ENSG00000183763      | 0.0034       | Not known                            |            |
| AC005586.2<br>ENSG00000261305 | 0.0032       | Not known                            |            |
| AC002401.3<br>ENSG00000275025 | 0.0032       | Not known                            |            |
| SNHG8<br>ENSG00000269893      | 0.0032       | Not known                            |            |
| ACAA1<br>ENSG00000060971      | 0.0031       | Not known                            |            |
| MRPS25<br>ENSG00000131368     | 0.0029       | Not known                            |            |

Table S57. List of top genes in classification of APC alterations when all tumour types were included in the analysis, their importance scores, and retrieved associations with either APC or colorectal cancers (CRCs)

| Gene                          | Score  | Known Associations with APC or COADREAD                                                                                                            | Ref |
|-------------------------------|--------|----------------------------------------------------------------------------------------------------------------------------------------------------|-----|
| CDX2<br>ENSG00000165556       | 0.0381 | Intestinal specific transcription factor that activates APC                                                                                        | 164 |
| NOX1<br>ENSG00000007952       | 0.0325 | Is over-expressed in colon cancers and correlates with activating mutations in K-Ras                                                               | 165 |
| TRABD2A<br>ENSG00000186854    | 0.0319 | Antagonizes Wnt function                                                                                                                           | 166 |
| RNF43<br>ENSG00000108375      | 0.0279 | Its mutations are associated with aggressive CRCs                                                                                                  | 167 |
| AL117382.2<br>ENSG00000226812 | 0.0263 | Not known                                                                                                                                          |     |
| AP003774.2<br>ENSG00000236935 | 0.0241 | Not known                                                                                                                                          |     |
| LY6G6D<br>ENSG00000244355     | 0.0236 | Significantly overexpressed in CRC when compared with other human solid tumours                                                                    | 28  |
| GPA33<br>ENSG00000143167      | 0.0227 | An antigen expressed in >95% of colon cancers                                                                                                      | 168 |
| CDX1<br>ENSG00000113722       | 0.0224 | Necessary for the proper development of the intestinal tract and homeostasis of the intestinal epithelium. Also plays a role in CRC aggressiveness | 169 |
| AXIN2<br>ENSG00000168646      | 0.0217 | Plays a role in the pathogenesis of colorectal cancer                                                                                              | 170 |

Table S58. List of top genes in classification of BRAF alterations when only thyroid tumour samples were included in the analysis, their importance scores, and retrieved associations with BRAF

| Gene                       | Score  | Known Associations with BRAF                                                                                                 | Ref   |
|----------------------------|--------|------------------------------------------------------------------------------------------------------------------------------|-------|
| DCSTAMP<br>ENSG00000164935 | 0.0487 | Is overexpressed in presence of BRAF mutations in thyroid cancer                                                             | 50,51 |
| TMPRSS6<br>ENSG00000187045 | 0.0436 | Is overexpressed in presence of BRAF mutations in thyroid cancer                                                             | 52    |
| PNPLA5<br>ENSG00000100341  | 0.0306 | Not known                                                                                                                    |       |
| ERBB3<br>ENSG00000065361   | 0.0305 | Is one of the most potent activators of AKT pathway and a key factor in development of resistance to BRAF and MEK inhibitors | 54    |
| NECTIN4<br>ENSG00000143217 | 0.0304 | Is overexpressed in presence of BRAF mutations in melanoma                                                                   | 53    |
| PDLIM4<br>ENSG00000131435  | 0.0259 | Is overexpressed in presence of BRAF mutations in thyroid cancer                                                             | 56    |
| FN1<br>ENSG00000115414     | 0.0205 | Is differentially expressed between BRAF-wt and BRAF-mut samples in thyroid cancer                                           | 59    |
| CRLF2<br>ENSG00000205755   | 0.0184 | Not known                                                                                                                    |       |
| SYT12<br>ENSG00000173227   | 0.0164 | It is associated with BRAF mutated thyroid tumours                                                                           | 60    |

|                            |        |                                                                                      |       |
|----------------------------|--------|--------------------------------------------------------------------------------------|-------|
| LY6G6C<br>ENSG00000204421  | 0.0162 | Not known                                                                            |       |
| KLK7<br>ENSG00000169035    | 0.0152 | Is overexpressed in presence of BRAF mutations in thyroid cancer                     | 57    |
| SLC34A2<br>ENSG00000157765 | 0.0149 | Is overexpressed in BRAF mutant and underexpressed in BRAF wild-type thyroid tumours | 51,61 |
| EPHA10<br>ENSG00000183317  | 0.0138 | Is significantly downregulated in thyroid tumours with wild-type BRAF                | 51    |
| KLK10<br>ENSG00000129451   | 0.0121 | Is hypomethylated in thyroid tumours with mutated BRAF                               | 55    |
| TACSTD2<br>ENSG00000184292 | 0.0115 | Is overexpressed in presence of BRAF mutations in thyroid cancer                     | 58    |

Table S59. List of top genes in classification of BRAF alterations when only colorectal tumour samples were included in the analysis, their importance scores, and retrieved associations with BRAF

| Gene                             | Score  | Known Associations with BRAF                                    | Ref         |
|----------------------------------|--------|-----------------------------------------------------------------|-------------|
| CTTNBP2<br>ENSG00000077063       | 0.0165 | Was shown to be a gene fusion partner with BRAF                 | 171,<br>172 |
| RPS4XP7<br>ENSG00000218265       | 0.0153 | Not known                                                       |             |
| PTPRD-AS1<br>ENSG00000225706     | 0.0131 | Not known                                                       |             |
| AP003774.2<br>ENSG00000236935    | 0.0112 | Not known                                                       |             |
| LY6G6F-LY6G6D<br>ENSG00000250641 | 0.0110 | Not known                                                       |             |
| TRIM7<br>ENSG00000146054         | 0.0109 | Is phosphorylated and activated in a BRAF dependent manner      | 173         |
| LY6G6D<br>ENSG00000244355        | 0.0109 | Is highly downregulated in colorectal cancer with mutated BRAF  | 174         |
| TDGF1<br>ENSG00000241186         | 0.0102 | Not known                                                       |             |
| ADGB<br>ENSG00000118492          | 0.0095 | Not known                                                       |             |
| SLC30A2<br>ENSG00000158014       | 0.0094 | Was found to be downregulated in BRAF wild-type thyroid tumours | 51          |
| CELP<br>ENSG00000170827          | 0.0093 | Not known                                                       |             |
| ADGRG6<br>ENSG00000112414        | 0.0082 | Not known                                                       |             |
| TFAP2A<br>ENSG00000137203        | 0.0081 | Not known                                                       |             |
| TRPV6<br>ENSG00000165125         | 0.0078 | Not known                                                       |             |
| POU5F1B<br>ENSG00000212993       | 0.0075 | Not known                                                       |             |

Table S60. Top five pathways affected by gene alterations with p-value greater than 0.05 (Fewer pathways reported if less than five meet this threshold).

| Gene   | Category                 | Pathway                                              | P-value | Adjusted P-value |
|--------|--------------------------|------------------------------------------------------|---------|------------------|
| APC    | GOTERM_BP_DIRECT         | Stem Cell Proliferation                              | 0.0013  | 0.20             |
|        | UP_SEQ_FEATURE           | LIPID: GPI-anchor Amidated Serine                    | 0.0015  | 0.25             |
|        | INTERPRO                 | ZNRF-3 Ecto                                          | 0.0020  | 0.11             |
|        | GOTERM_BP_DIRECT         | Wnt Receptor Catabolic Process                       | 0.0022  | 0.20             |
|        | INTERPRO                 | LY6G6d/LY6G6f                                        | 0.0031  | 0.11             |
| ARID1A | UP_KW_MOLECULAR_FUNCTION | Ion Channel                                          | 3.6e-4  | 0.01             |
|        | UP_KW_MOLECULAR_FUNCTION | Voltage-gated Channel                                | 0.0021  | 0.03             |
|        | GOTERM_MF_DIRECT         | Transmembrane Transporter Binding                    | 0.0026  | 0.20             |
|        | GOTERM_BP_DIRECT         | Action Potential                                     | 0.0031  | 0.47             |
|        | UP_KW_BIOLOGICAL_PROCESS | Ion Transport                                        | 0.0035  | 0.067            |
| ATR    | GOTERM_BP_DIRECT         | Cell Division                                        | 2.2e-15 | 5.7e-13          |
|        | UP_KW_BIOLOGICAL_PROCESS | Cell Division                                        | 5.1e-15 | 1.6e-13          |
|        | UP_KW_BIOLOGICAL_PROCESS | Mitosis                                              | 4.1e-14 | 6.6e-13          |
|        | UP_KW_BIOLOGICAL_PROCESS | Cell Cycle                                           | 3.7e-13 | 3.9e-12          |
|        | GOTERM_BP_DIRECT         | Mitotic Cell Cycle                                   | 1.1e-10 | 1.4e-8           |
| ATRX   | GOTERM_BP_DIRECT         | Cytoplasmic Translation                              | 0.0011  | 0.34             |
|        | GOTERM_BP_DIRECT         | Positive Regulation of Protein Binding               | 0.0043  | 0.69             |
|        | GOTERM_CC_DIRECT         | Cytosolic Large Ribosomal Subunit                    | 0.0093  | 0.65             |
|        | GOTERM_CC_DIRECT         | Cytosolic Ribosome                                   | 0.013   | 0.65             |
|        | GOTERM_BP_DIRECT         | Cellular Response to Peptidoglycan                   | 0.014   | 1.0              |
| BRAF   | GOTERM_CC_DIRECT         | Extracellular Region                                 | 1.8e-6  | 2.3e-4           |
|        | UP_KW_CELLULAR_COMPONENT | Secreted                                             | 2.7e-5  | 6.4e-4           |
|        | UP_SEQ_FEATURE           | DOMAIN: UPAR/Ly6                                     | 2.3e-4  | 0.085            |
|        | GOTERM_CC_DIRECT         | Plasma Membrane                                      | 2.6e-4  | 0.017            |
|        | INTERPRO                 | PH Domain                                            | 3.2e-4  | 0.047            |
| BRCA1  | GOTERM_BP_DIRECT         | Negative Regulation of Myofibroblast Differentiation | 0.0039  | 0.34             |
|        | GOTERM_BP_DIRECT         | Response to Alkaloid                                 | 0.0061  | 0.34             |
|        | UP_KW_DISEASE            | Williams-Beuren Syndrome                             | 0.012   | 0.025            |
|        | GOTERM_BP_DIRECT         | Response to Hormone                                  | 0.021   | 0.78             |
|        | GOTERM_CC_DIRECT         | Dendrite                                             | 0.023   | 0.68             |
| CDH1   | UP_KW_MOLECULAR_FUNCTION | RNA-binding                                          | 0.035   | 0.39             |
|        | GOTERM_CC_DIRECT         | Cytoplasmic Stress Granule                           | 0.046   | 1.0              |

|        |                          |                                                                  |         |         |
|--------|--------------------------|------------------------------------------------------------------|---------|---------|
|        | GOTERM_BP_DIRECT         | Negative Regulation of Translation                               | 0.050   | 1.0     |
| CDKN2A | UP_KW_BIOLOGICAL_PROCESS | Mitosis                                                          | 3.5e-32 | 1.2e-30 |
|        | UP_KW_BIOLOGICAL_PROCESS | Cell Cycle                                                       | 5.1e-28 | 6.8e-27 |
|        | UP_KW_BIOLOGICAL_PROCESS | Cell Division                                                    | 6.2e-28 | 6.8e-27 |
|        | GOTERM_BP_DIRECT         | Cell Division                                                    | 6.9e-27 | 2.6e-24 |
|        | UP_KW_CELLULAR_COMPONENT | Centromere                                                       | 1.2e-14 | 2.4e-13 |
| CTCF   | UP_KW_BIOLOGICAL_PROCESS | Cell Division                                                    | 7.1e-7  | 9.8e-6  |
|        | UP_KW_BIOLOGICAL_PROCESS | Cell Cycle                                                       | 1.4e-6  | 9.8e-6  |
|        | UP_KW_BIOLOGICAL_PROCESS | Mitosis                                                          | 1.7e-6  | 9.8e-6  |
|        | GOTERM_BP_DIRECT         | Cell Division                                                    | 1.9e-6  | 3.9e-4  |
|        | GOTERM_MF_DIRECT         | Protein Kinase Binding                                           | 1.4e-5  | 1.2e-3  |
| CTNNB1 | UP_KW_CELLULAR_COMPONENT | Endoplasmic Reticulum                                            | 5.6e-4  | 0.0067  |
|        | GOTERM_CC_DIRECT         | Endoplasmic Reticulum Membrane                                   | 0.0019  | 0.095   |
|        | GOTERM_BP_DIRECT         | Apoptotic Process                                                | 0.0094  | 0.72    |
|        | UP_SEQ_FEATURE           | CARBOHYD: N-linked (GlcNAc...) Asparagine                        | 0.011   | 0.65    |
|        | UP_SEQ_FEATURE           | TRANSMEM: Helical                                                | 0.011   | 0.65    |
| EGFR   | UP_KW_CELLULAR_COMPONENT | Golgi Apparatus                                                  | 0.0076  | 0.15    |
|        | GOTERM_BP_DIRECT         | Stimulatory C-type Lectin Receptor Signaling Pathway             | 0.024   | 1.0     |
|        | BIOCARTA                 | Ras-Independent Pathway in NK Cell-mediated Cytotoxicity         | 0.025   | 0.049   |
|        | GOTERM_BP_DIRECT         | Positive Regulation of Natural Killer Cell mediated Cytotoxicity | 0.029   | 1.0     |
|        | UP_KW_CELLULAR_COMPONENT | Cytoplasm                                                        | 0.038   | 0.38    |
| EZH2   | GOTERM_BP_DIRECT         | Anatomical Structure Development                                 | 0.032   | 1.0     |
| FBXW7  | UP_KW_BIOLOGICAL_PROCESS | Mitosis                                                          | 8.9e-34 | 2.2e-32 |
|        | UP_KW_BIOLOGICAL_PROCESS | Cell Cycle                                                       | 8.3e-31 | 1.0e-29 |
|        | UP_KW_BIOLOGICAL_PROCESS | Cell Division                                                    | 1.1e-29 | 9.5e-29 |
|        | GOTERM_BP_DIRECT         | Cell Division                                                    | 1.2e-27 | 3.8e-25 |
|        | UP_KW_CELLULAR_COMPONENT | Centromere                                                       | 1.4e-19 | 2.7e-18 |
| GATA3  | GOTERM_BP_DIRECT         | Cell Division                                                    | 8.8e-23 | 2.3e-20 |
|        | UP_KW_BIOLOGICAL_PROCESS | Mitosis                                                          | 8.0e-22 | 2.2e-20 |
|        | UP_KW_BIOLOGICAL_PROCESS | Cell Division                                                    | 5.2e-19 | 7.3e-18 |
|        | UP_KW_BIOLOGICAL_PROCESS | Cell Cycle                                                       | 4.6e-18 | 4.3e-17 |
|        | UP_KW_CELLULAR_COMPONENT | Centromere                                                       | 9.1e-16 | 1.2e-14 |
| KDM6A  | INTERPRO                 | G TR CS                                                          | 1.2e-5  | 6.5e-4  |
|        | UP_SEQ_FEATURE           | DOMAIN: Tr-type G                                                | 2.9e-5  | 0.0011  |
|        | INTERPRO                 | EFTu-like 2                                                      | 3.1e-5  | 8.7e-4  |
|        | GOTERM_MF_DIRECT         | GTPase Activity                                                  | 3.4e-5  | 8.8e-4  |
|        | GOTERM_BP_DIRECT         | Translational Elongation                                         | 3.9e-5  | 0.0015  |
| KEAP1  | GOTERM_CC_DIRECT         | Neuronal Cell Body                                               | 0.0023  | 0.14    |
|        | GOTERM_CC_DIRECT         | Plasma Membrane                                                  | 0.0028  | 0.14    |

|        |                          |                                                       |         |         |
|--------|--------------------------|-------------------------------------------------------|---------|---------|
|        | UP_SEQ_FEATURE           | DOMAIN: F5/8 Type C2                                  | 0.011   | 1.0     |
|        | UP_SEQ_FEATURE           | DOMAIN: F5/8 Type C1                                  | 0.011   | 1.0     |
|        | GOTERM_BP_DIRECT         | Cellular Response to Leukemia Inhibitory Factor       | 0.012   | 1.0     |
| KIT    | UP_KW_BIOLOGICAL_PROCESS | Mitosis                                               | 4.3e-19 | 1.4e-17 |
|        | UP_KW_BIOLOGICAL_PROCESS | Cell Cycle                                            | 2.8e-18 | 4.6e-17 |
|        | UP_KW_BIOLOGICAL_PROCESS | Cell Division                                         | 5.7e-18 | 6.0e-17 |
|        | GOTERM_BP_DIRECT         | Cell Division                                         | 7.2e-18 | 1.9e-15 |
|        | GOTERM_CC_DIRECT         | Kinetochores                                          | 1.9e-13 | 1.6e-11 |
| KRAS   | UP_SEQ_FEATURE           | CARBOHYD: N-linked (GlcNAc...) Asparagine             | 4.6e-4  | 0.083   |
|        | GOTERM_CC_DIRECT         | Plasma Membrane                                       | 4.8e-4  | 0.031   |
|        | GOTERM_CC_DIRECT         | Cell Surface                                          | 0.0073  | 0.24    |
|        | UP_SEQ_FEATURE           | DOMAIN: Ig-like V-type                                | 0.011   | 1.0     |
|        | UP_KW_PTM                | Glycoprotein                                          | 0.013   | 0.14    |
| MAP3K1 | UP_KW_BIOLOGICAL_PROCESS | Mitosis                                               | 5.5e-16 | 1.2e-14 |
|        | UP_KW_BIOLOGICAL_PROCESS | Cell Division                                         | 2.5e-15 | 2.8e-14 |
|        | GOTERM_BP_DIRECT         | Cell Division                                         | 2.8e-14 | 5.1e-12 |
|        | UP_KW_BIOLOGICAL_PROCESS | Cell Cycle                                            | 1.7e-13 | 1.2e-12 |
|        | GOTERM_BP_DIRECT         | Mitotic Cell Cycle                                    | 2.9e-9  | 2.7e-7  |
| NCOR1  | UP_KW_BIOLOGICAL_PROCESS | Mitosis                                               | 1.3e-16 | 3.2e-15 |
|        | UP_KW_BIOLOGICAL_PROCESS | Cell Cycle                                            | 9.4e-16 | 1.2e-14 |
|        | UP_KW_BIOLOGICAL_PROCESS | Cell Division                                         | 1.9e-14 | 1.6e-13 |
|        | GOTERM_BP_DIRECT         | Cell Division                                         | 3.4e-11 | 1.1e-8  |
|        | UP_KW_CELLULAR_COMPONENT | Centromere                                            | 1.1e-10 | 2.2e-9  |
| NF1    | UP_KW_BIOLOGICAL_PROCESS | Mitosis                                               | 6.2e-16 | 1.5e-14 |
|        | UP_KW_BIOLOGICAL_PROCESS | Cell Division                                         | 6.3e-14 | 7.9e-13 |
|        | GOTERM_BP_DIRECT         | Cell Division                                         | 8.1e-14 | 1.9e-11 |
|        | UP_KW_BIOLOGICAL_PROCESS | Cell Cycle                                            | 3.5e-11 | 2.9e-10 |
|        | UP_KW_CELLULAR_COMPONENT | Centromere                                            | 1.3e-9  | 2.3e-8  |
| NOTCH1 | GOTERM_CC_DIRECT         | Uniplex Complex                                       | 0.0092  | 0.60    |
|        | GOTERM_BP_DIRECT         | Mitochondrial Calcium Ion Transmembrane Transport     | 0.015   | 1.0     |
|        | GOTERM_BP_DIRECT         | Calcium Import into the Mitochondrion                 | 0.017   | 1.0     |
|        | GOTERM_BP_DIRECT         | Mitochondrial Calcium Ion Homeostasis                 | 0.021   | 1.0     |
|        | UP_SEQ_FEATURE           | TRANSIT: Mitochondrion                                | 0.032   | 1.0     |
| NRAS   | GOTERM_BP_DIRECT         | Inflammatory Response                                 | 2.2e-4  | 0.093   |
|        | GOTERM_BP_DIRECT         | Regulation of Canonical NF-kappaB Signal Transduction | 2.3e-4  | 0.093   |
|        | GOTERM_BP_DIRECT         | Cell-cell Junction Maintenance                        | 4.0e-4  | 0.11    |

|        |                                                                     |                                                                              |         |         |
|--------|---------------------------------------------------------------------|------------------------------------------------------------------------------|---------|---------|
|        | GOTERM_BP_DIRECT                                                    | Positive Regulation of Chemokine Production                                  | 6.1e-4  | 0.12    |
|        | GOTERM_BP_DIRECT                                                    | Signal Transduction                                                          | 8.4e-4  | 0.14    |
| NSD1   | UP_KW_BIOLOGICAL_PROCESS                                            | Mitosis                                                                      | 3.5e-18 | 6.0e-17 |
|        | UP_KW_BIOLOGICAL_PROCESS                                            | Cell Division                                                                | 9.3e-18 | 7.9e-17 |
|        | GOTERM_BP_DIRECT                                                    | Cell Division                                                                | 7.5e-16 | 1.5e-13 |
|        | UP_KW_BIOLOGICAL_PROCESS                                            | Cell Cycle                                                                   | 1.6e-14 | 8.9e-14 |
|        | GOTERM_BP_DIRECT                                                    | Mitotic Cell Cycle                                                           | 9.1e-10 | 9.2e-8  |
| PBRM1  | GOTERM_MF_DIRECT                                                    | Protein Homodimerization Activity                                            | 0.0041  | 0.20    |
|        | GOTERM_BP_DIRECT                                                    | Positive Regulation of Protein-containing Complex Assembly                   | 0.023   | 1.0     |
| PIK3CA | UP_KW_MOLECULAR_FUNCTION                                            | Transferase                                                                  | 0.019   | 0.24    |
|        | UP_SEQ_FEATURE                                                      | TRANSMEM: Helical; Signal -anchor for type II Membrane Protein               | 0.043   | 1.0     |
| PTEN   | UP_KW_BIOLOGICAL_PROCESS                                            | Cell Cycle                                                                   | 6.9e-16 | 1.3e-14 |
|        | UP_KW_BIOLOGICAL_PROCESS                                            | Mitosis                                                                      | 7.4e-16 | 1.3e-14 |
|        | GOTERM_BP_DIRECT                                                    | Cell Division                                                                | 1.1e-14 | 4.4e-12 |
|        | UP_KW_BIOLOGICAL_PROCESS                                            | Cell Division                                                                | 1.1e-14 | 1.2e-13 |
|        | UP_KW_CELLULAR_COMPONENT                                            | Centromere                                                                   | 2.4e-9  | 4.9e-8  |
| RB1    | UP_KW_BIOLOGICAL_PROCESS                                            | Cell Cycle                                                                   | 2.0e-28 | 2.7e-27 |
|        | UP_KW_BIOLOGICAL_PROCESS                                            | Mitosis                                                                      | 2.2e-28 | 2.7e-27 |
|        | GOTERM_BP_DIRECT                                                    | Cell Division                                                                | 1.6e-26 | 6.1e-24 |
|        | UP_KW_BIOLOGICAL_PROCESS                                            | Cell Division                                                                | 1.4e-24 | 1.1e-23 |
|        | UP_KW_CELLULAR_COMPONENT                                            | Centromere                                                                   | 5.2e-17 | 9.9e-16 |
| SETBP1 | No pathway was found based on the top eight genes in classification |                                                                              |         |         |
| SETD2  | UP_KW_BIOLOGICAL_PROCESS                                            | Transport                                                                    | 0.0033  | 0.02    |
|        | GOTERM_MF_DIRECT                                                    | Monoatomic Cation Transmembrane Transporter Activity                         | 0.0052  | 0.14    |
|        | GOTERM_MF_DIRECT                                                    | Efflux Transmembrane Transporter Activity                                    | 0.0072  | 0.14    |
| SF3B1  | GOTERM_MF_DIRECT                                                    | Cysteine-type Endopeptidase Activator Activity involved in Apoptotic Process | 3.7e-4  | 0.028   |
|        | UP_KW_MOLECULAR_FUNCTION                                            | Hydrolase                                                                    | 0.0014  | 0.022   |
|        | GOTERM_CC_DIRECT                                                    | Protease Inhibitor Complex                                                   | 0.0023  | 0.11    |
|        | UP_KW_MOLECULAR_FUNCTION                                            | Protease                                                                     | 0.0024  | 0.022   |
|        | UP_SEQ_FEATURE                                                      | MUTAGEN: IKK->AKA: Abolished Ability to Cleave IL18                          | 0.0025  | 0.041   |
| SPOP   | UP_KW_CELLULAR_COMPONENT                                            | Mitochondrion                                                                | 4.8e-4  | 0.0086  |
|        | GOTERM_BP_DIRECT                                                    | Mitochondrial Translation                                                    | 0.0053  | 0.67    |

|       |                  |                 |        |      |
|-------|------------------|-----------------|--------|------|
|       | GOTERM_CC_DIRECT | Mitochondrion   | 0.0057 | 0.31 |
|       | GOTERM_BP_DIRECT | Translation     | 0.021  | 1.0  |
|       | UP_KW_DOMAIN     | Transit Peptide | 0.023  | 0.23 |
| STAG2 | SMART            | C2              | 0.046  | 0.46 |

Table S61. Top five pathways affected by BRAF gene alterations in thyroid and colorectal tumours with p-value greater than 0.05

| Tumour Type | Category                 | Pathway                                                  | P-value | Adjusted P-value |
|-------------|--------------------------|----------------------------------------------------------|---------|------------------|
| Thyroid     | UP_KW_CELLULAR_COMPONENT | Secreted                                                 | 9.0e-7  | 2.2e-5           |
|             | INTERPRO                 | PH Domain                                                | 2.6e-5  | 0.0072           |
|             | UP_SEQ_FEATURE           | DOMAIN: PH                                               | 3.0e-5  | 0.013            |
|             | GOTERM_CC_DIRECT         | Extracellular Region                                     | 6.2e-5  | 0.0084           |
|             | UP_SEQ_FEATURE           | CARBOHYD: N-linked (GlcNAc...) Asparagine                | 7.6e-5  | 0.017            |
| Colorectal  | GOTERM_CC_DIRECT         | Apical Plasma Membrane                                   | 0.0012  | 0.11             |
|             | UP_SEQ_FEATURE           | MUTAGEN: Missing: Abolishes MARCHF2-mediated degradation | 0.0040  | 1.0              |
|             | INTERPRO                 | LY6G6d/LY6G6f                                            | 0.0060  | 1.0              |
|             | KEGG_PATHWAY             | Pancreatic Secretion                                     | 0.0070  | 0.78             |
|             | GOTERM_MF_DIRECT         | Acetylcholine Receptor Inhibitor Activity                | 0.017   | 1.0              |

Table S62. Non-impactful mutation categories in which most samples were predicted as mutant (the p-value for each mutation type was obtained via a binomial test and it represents the probability of having the specific number of samples assigned to the mutant group assuming there is a 50% chance that samples will be assigned to this group by random assignment).

| Gene  | Mutation Type  | Number of Samples Classified as Mutant | Number of Samples Classified as WT | P-value |
|-------|----------------|----------------------------------------|------------------------------------|---------|
| EGFR  | Intron Variant | 21                                     | 1                                  | 1.1e-5  |
| EZH2  | Intron Variant | 14                                     | 5                                  | 0.06    |
| NCOR1 | Intron Variant | 65                                     | 21                                 | 2.0e-6  |
| RB1   | Intron Variant | 92                                     | 15                                 | 0.0     |

## Supplementary Figures

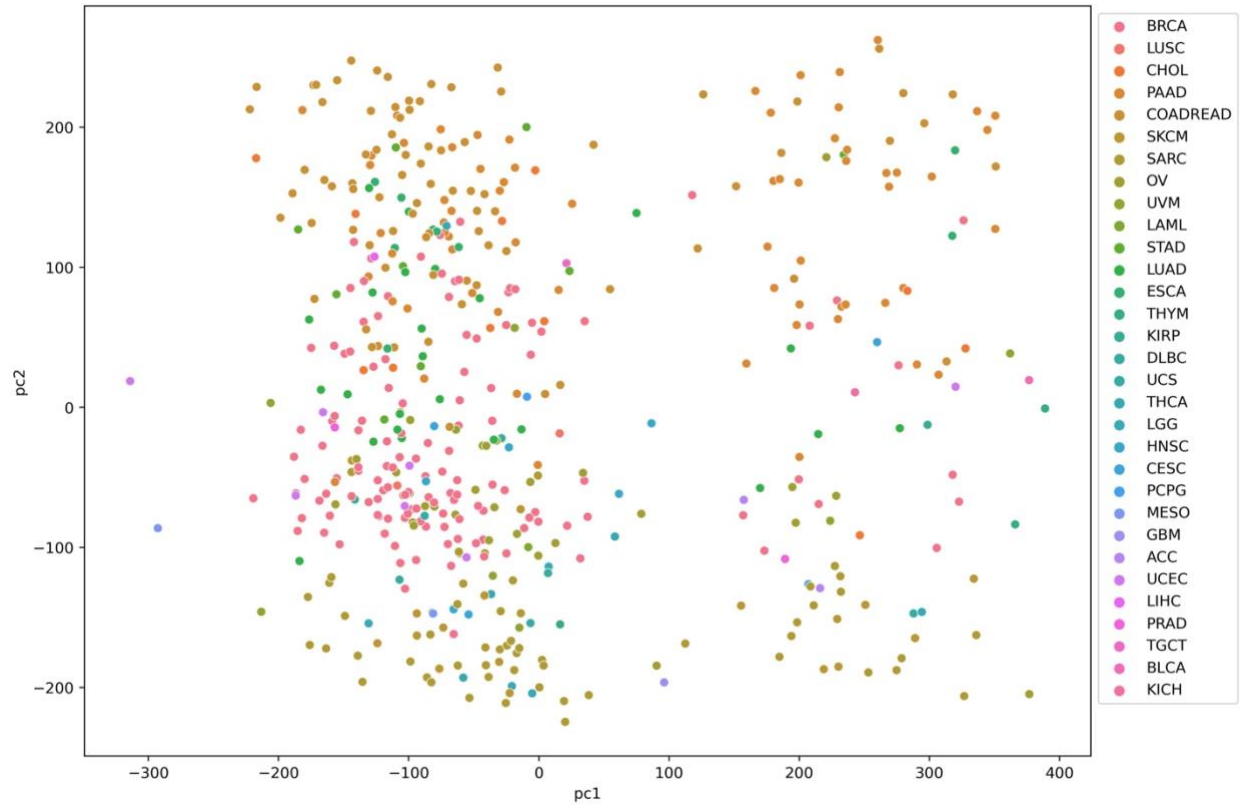

Figure S1. PCA plot made using  $\log_2(\text{TPM}+0.001)$  values of all POG samples. Colors represent different tumour types.

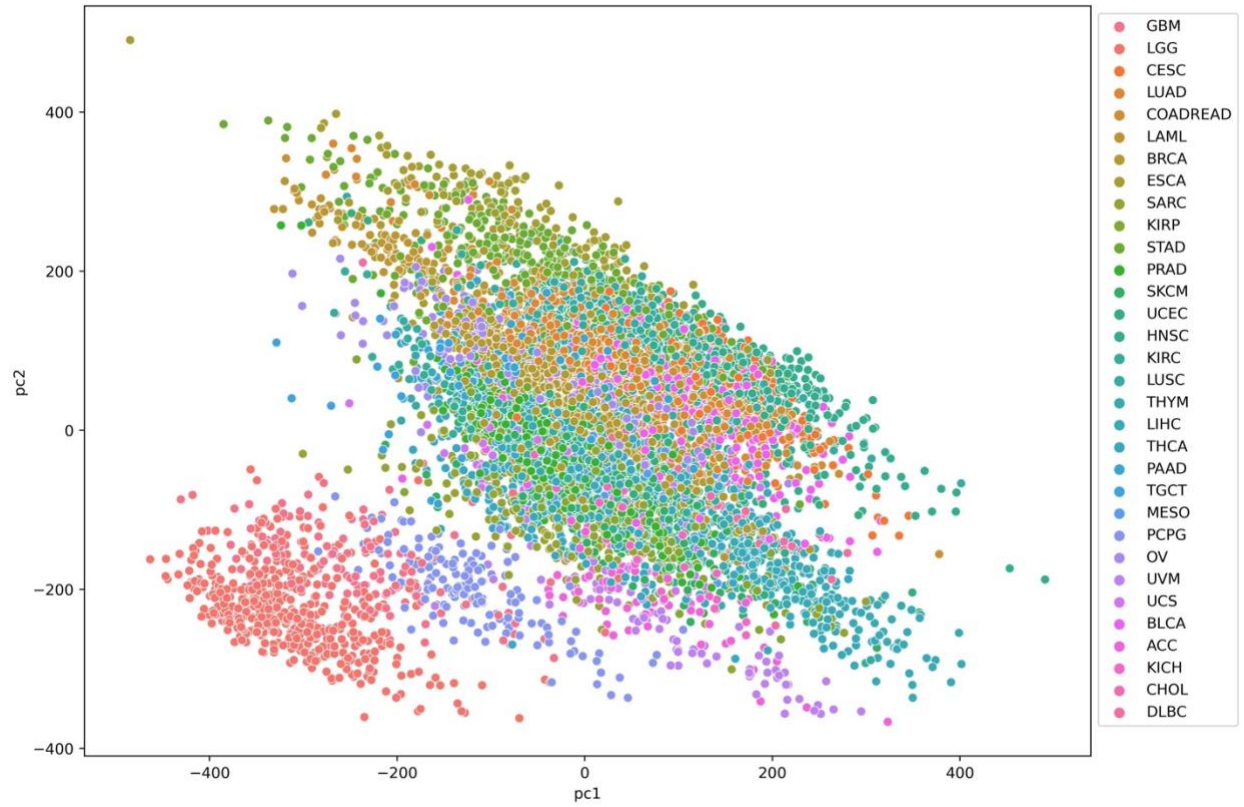

Figure S2. PCA plot made using  $\log_2(\text{TPM}+0.001)$  values of all TCGA samples. Colors represent different tumour types.

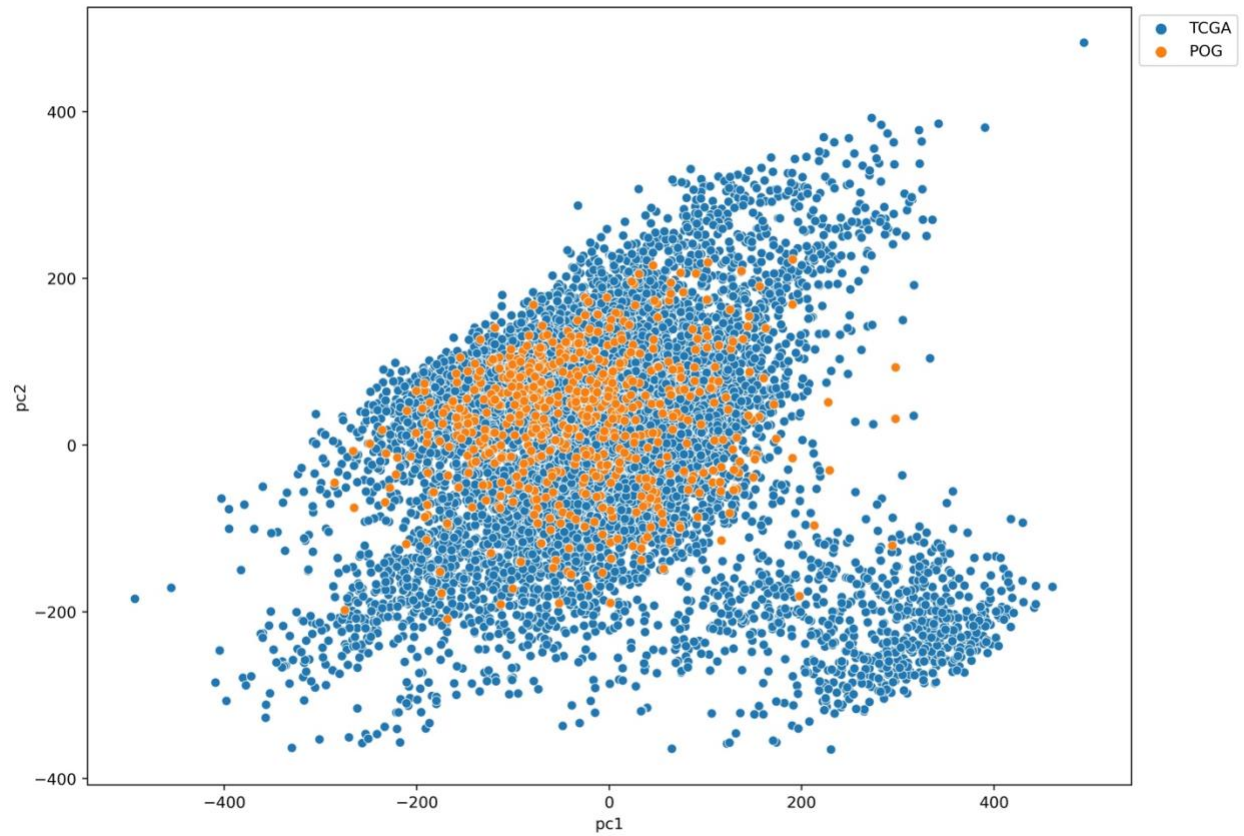

Figure S3. PCA plot made using  $\log_2(\text{TPM}+0.001)$  values of all TCGA and POG samples. Colors represent the cohorts that samples are from.

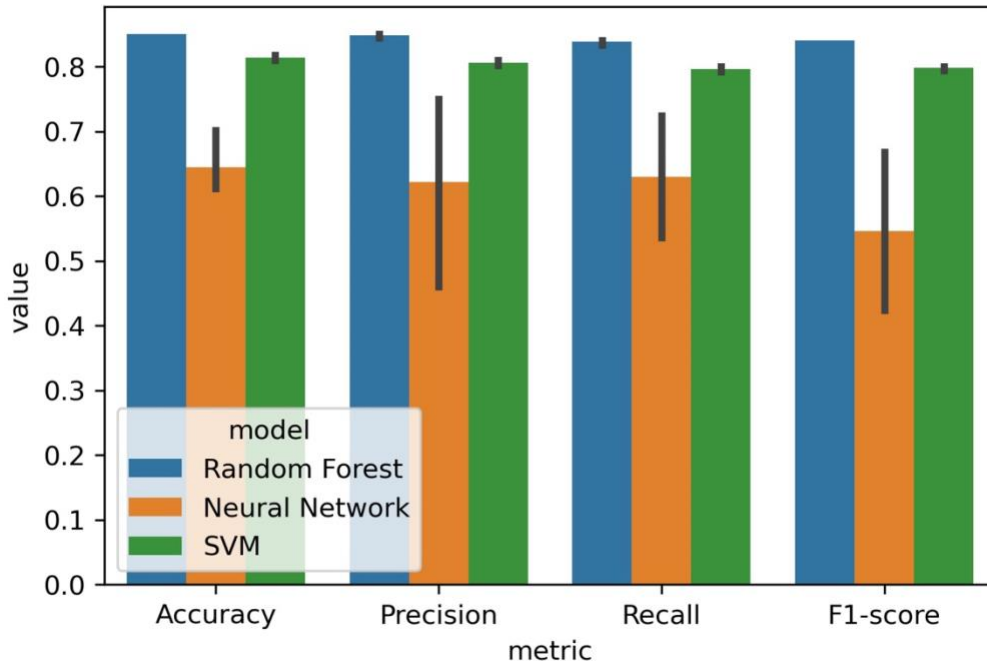

Figure S4. Performance metrics for classification of tumour samples based on *TP53* mutational status using random forest, support vector machine and neural network models.

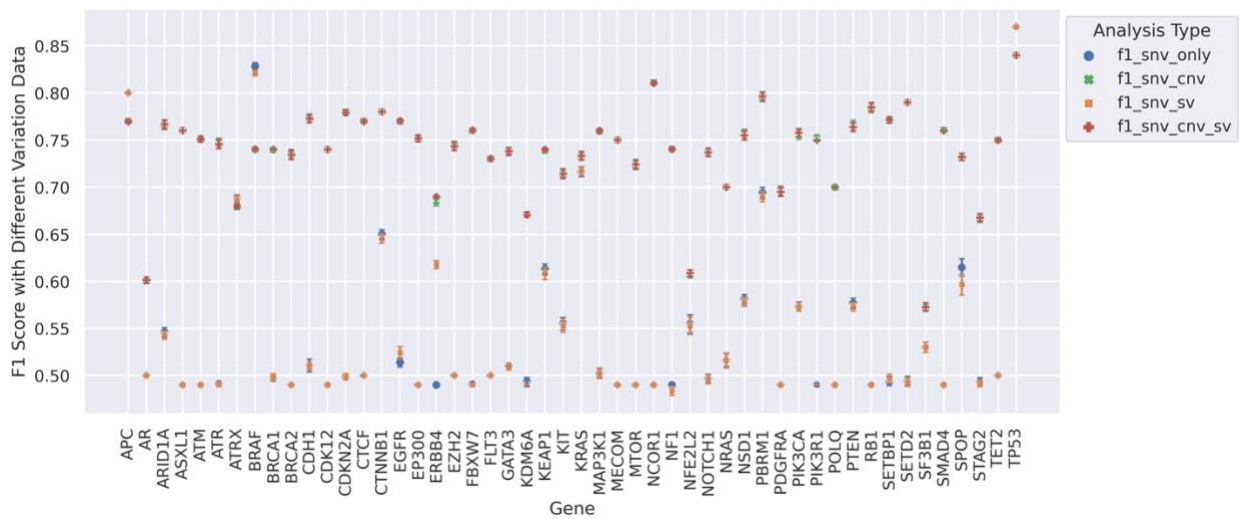

Figure S5. F1 score of classification based on different combinations of gene alterations. Blue circles represent results when only samples with SNVs/INDELs were labeled as mutant. Green crosses indicate results from analyses labeling samples with either SNVs/INDELs or CNAs as mutant. Orange squares show the results when samples with either SNVs/INDELs or SVs were labeled as mutant, and red crosses correspond to analyses where samples with any of SNVs/INDELs, CNAs, or SVs were labeled as mutant.

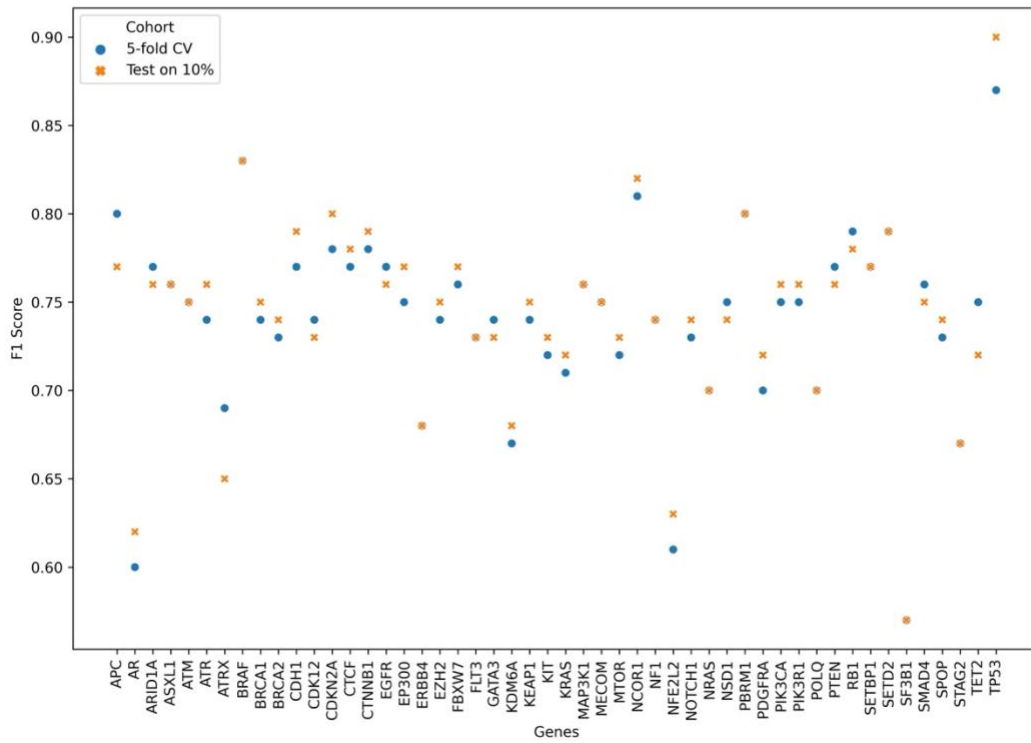

Figure S6. Comparison of F1 scores between 5-fold CV analyses and test on the 10% of randomly selected samples. Blue circles show the F1 scores when all samples were used in 5-fold CV analyses and orange crosses indicate the F1 scores when 90% of samples were used for training and 10% were used for testing.

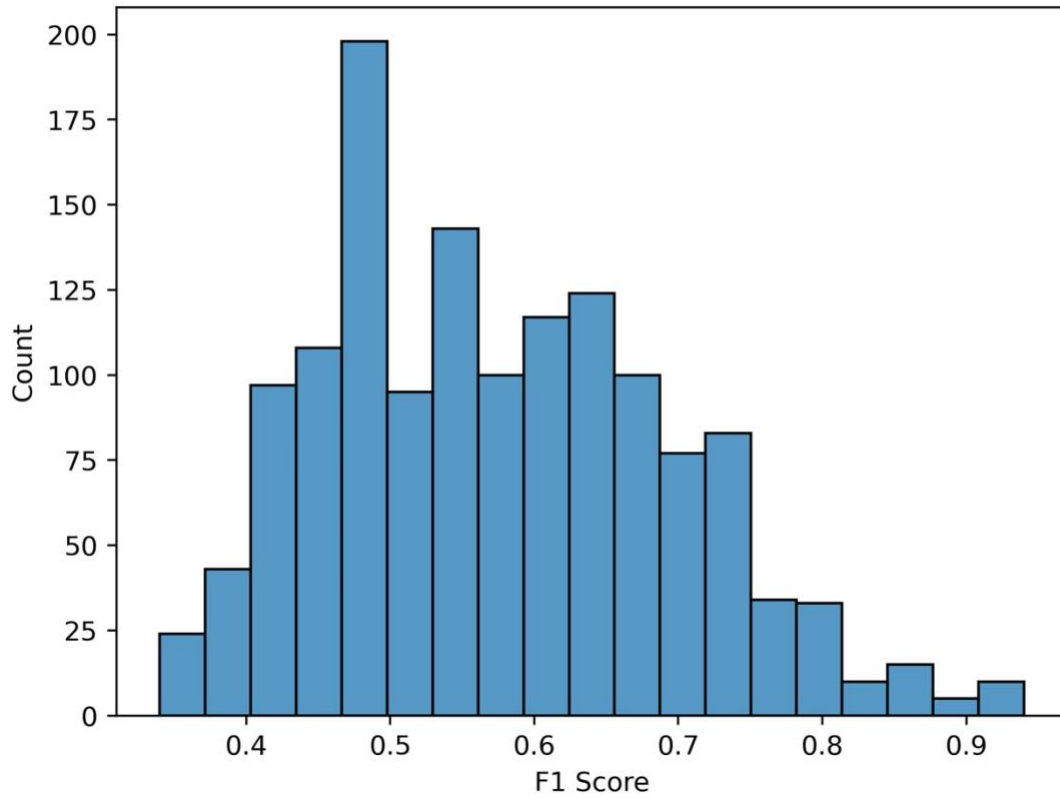

Figure S7. Distribution of F1 scores obtained from classifying samples based on alterations in 50 genes of interest across 33 TCGA tumour types.

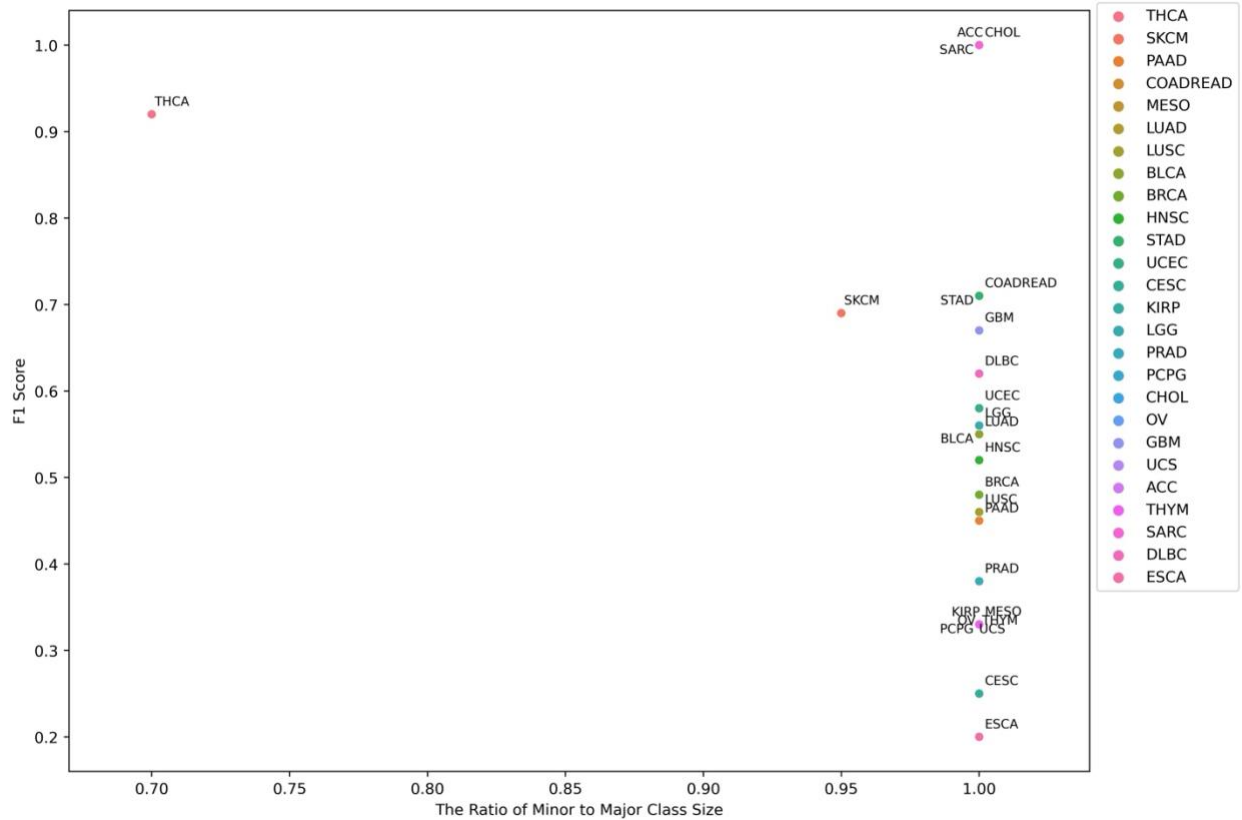

Figure S8. F1 score for classification of all samples in THCA and SKCM tumours and balanced sets of all other tumour types based on BRAF alterations (COAD and READ are combined). X-axis shows the ratio of the minor to the major group. The minor group is the set with either mutant or wild-type samples which is smaller in size and the major group is the set with either mutant or wild-type samples which is larger in size.

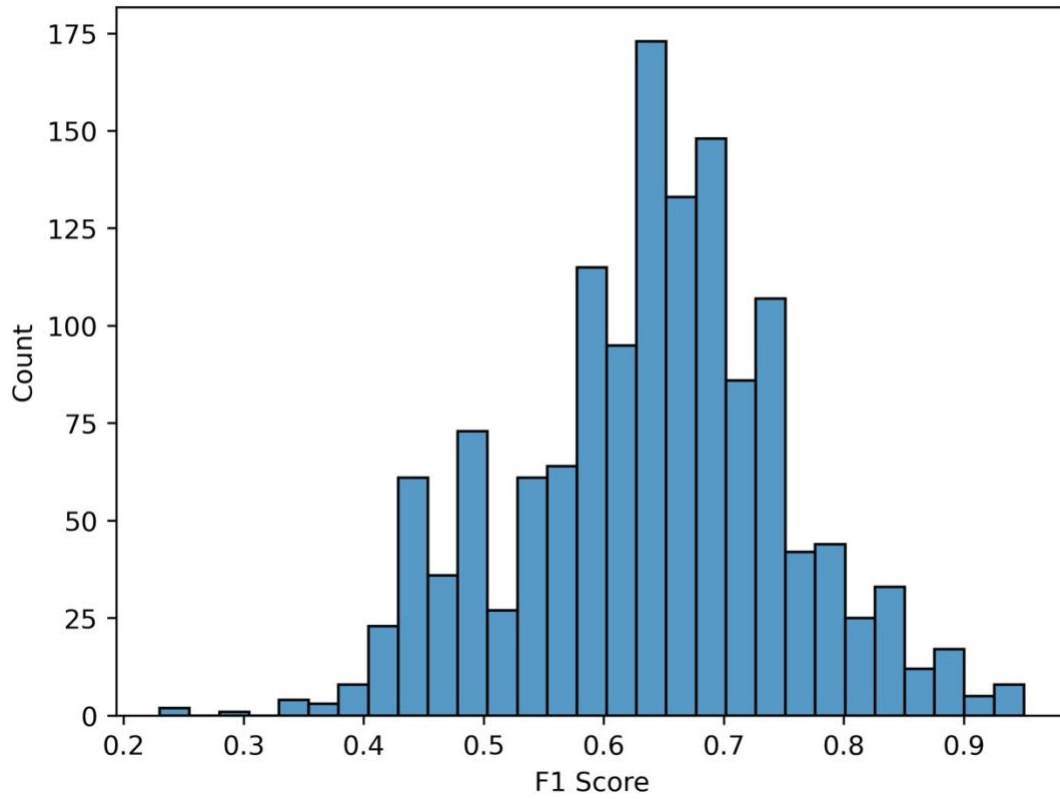

Figure S9. Distribution of F1 scores obtained from classifying balanced sets of samples based on alterations in 50 genes of interest across 33 TCGA tumour types.

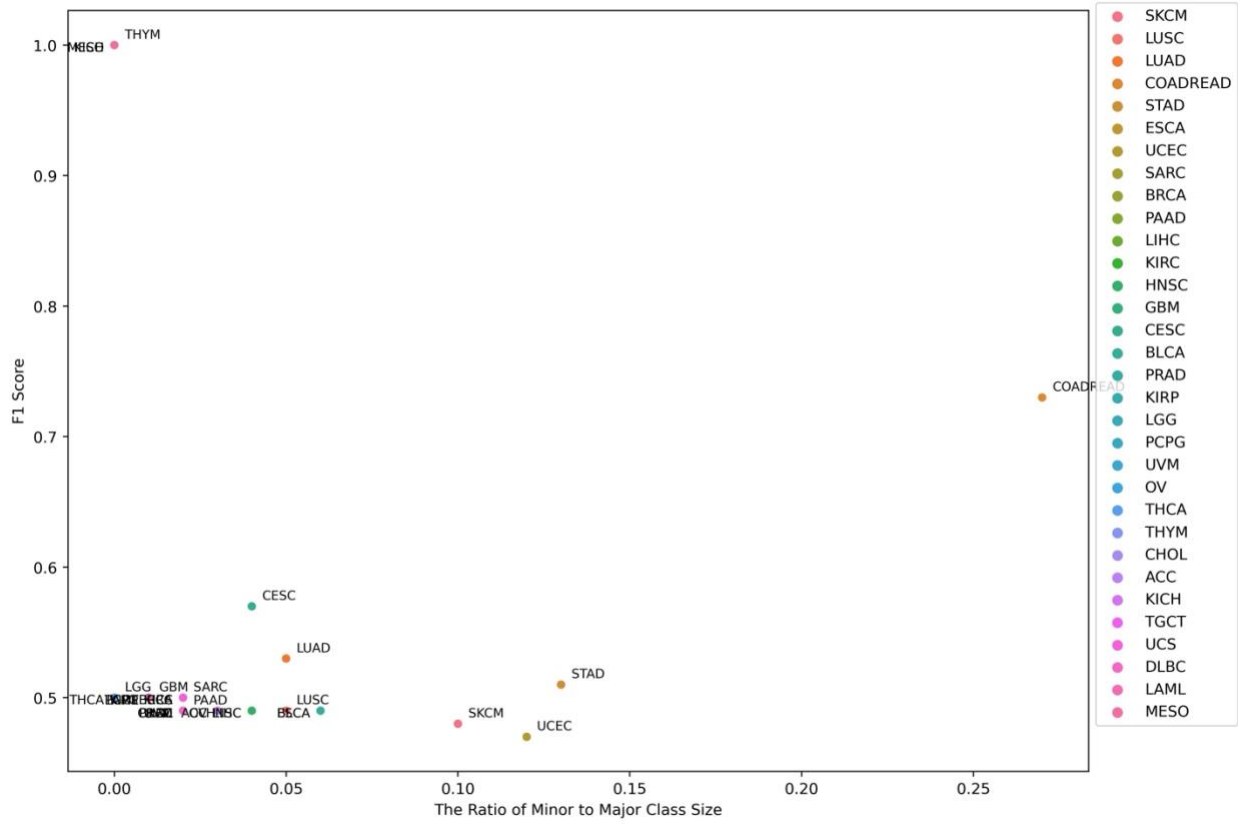

Figure S10. F1 score for classification of samples based on APC alterations against the ratio of the minor to the major group across 33 TCGA tumour type (COAD and READ are combined). The minor group is the set with either mutant or wild-type samples which is smaller in size and the major group is the set with either mutant or wild-type samples which is larger in size

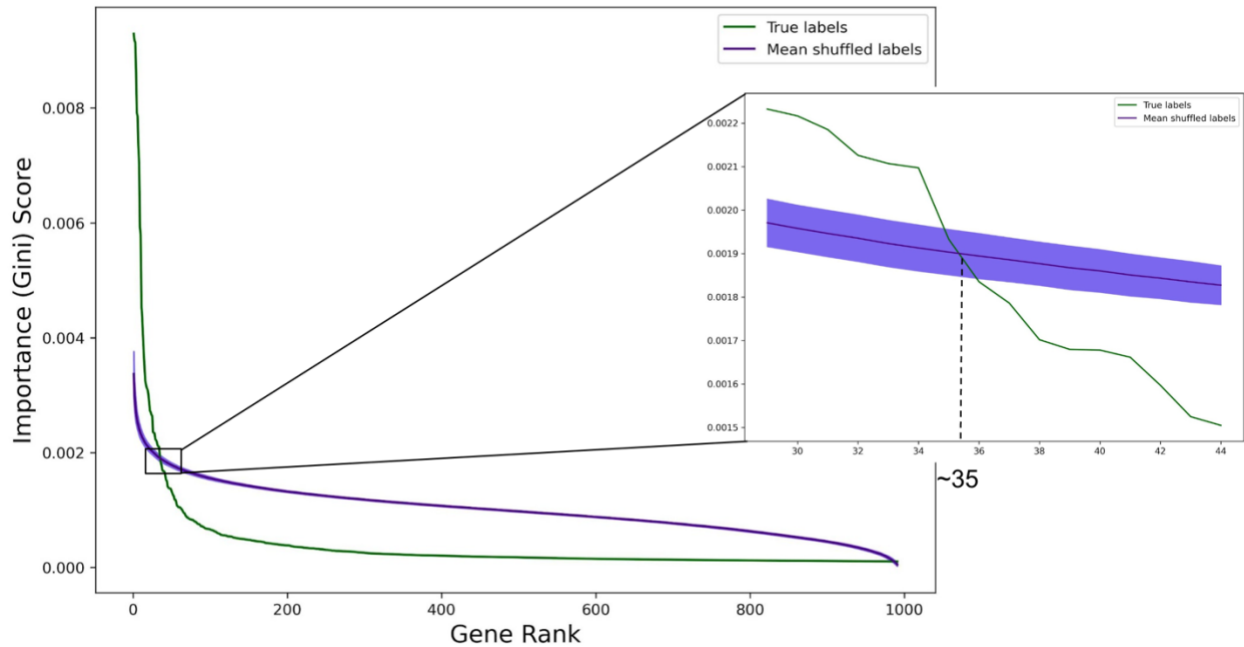

Figure S11. The importance scores in classification of KRAS alterations versus gene ranks extracted from the model trained using true labels (green) and the mean and standard deviation of importance scores of the gene ranks over 100 permutations of training the random forest with randomly shuffled labels (purple).

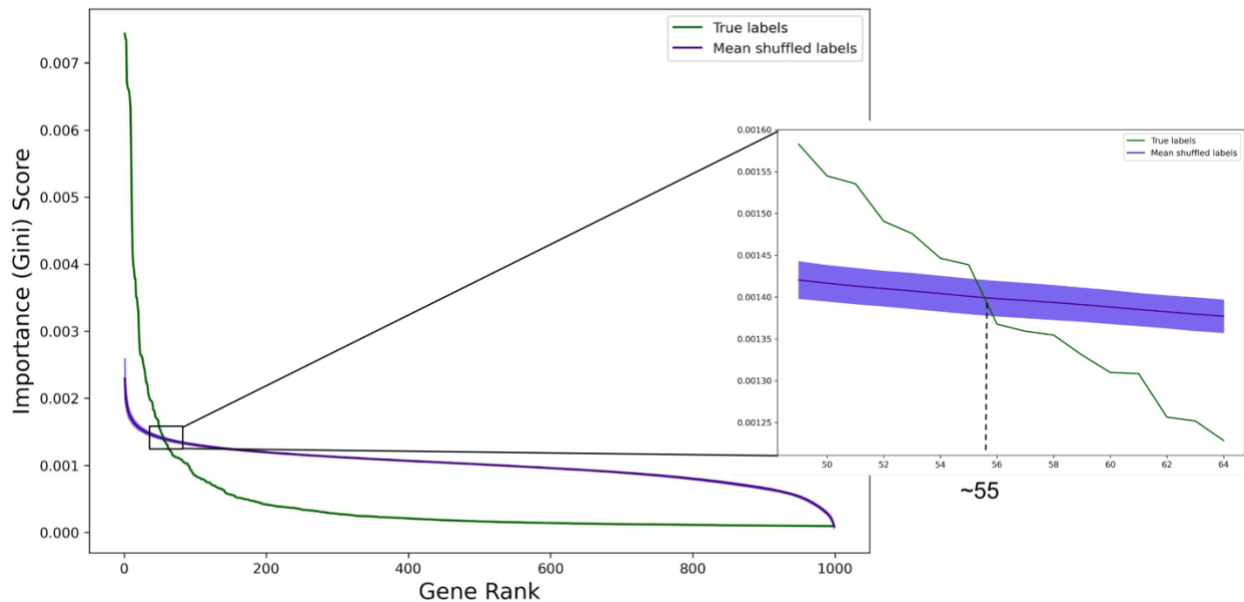

Figure S12. The importance scores in classification of PTEN alterations versus gene ranks extracted from the model trained using true labels (green) and the mean and standard deviation

of importance scores of the gene ranks over 100 permutations of training the random forest with randomly shuffled labels (purple).

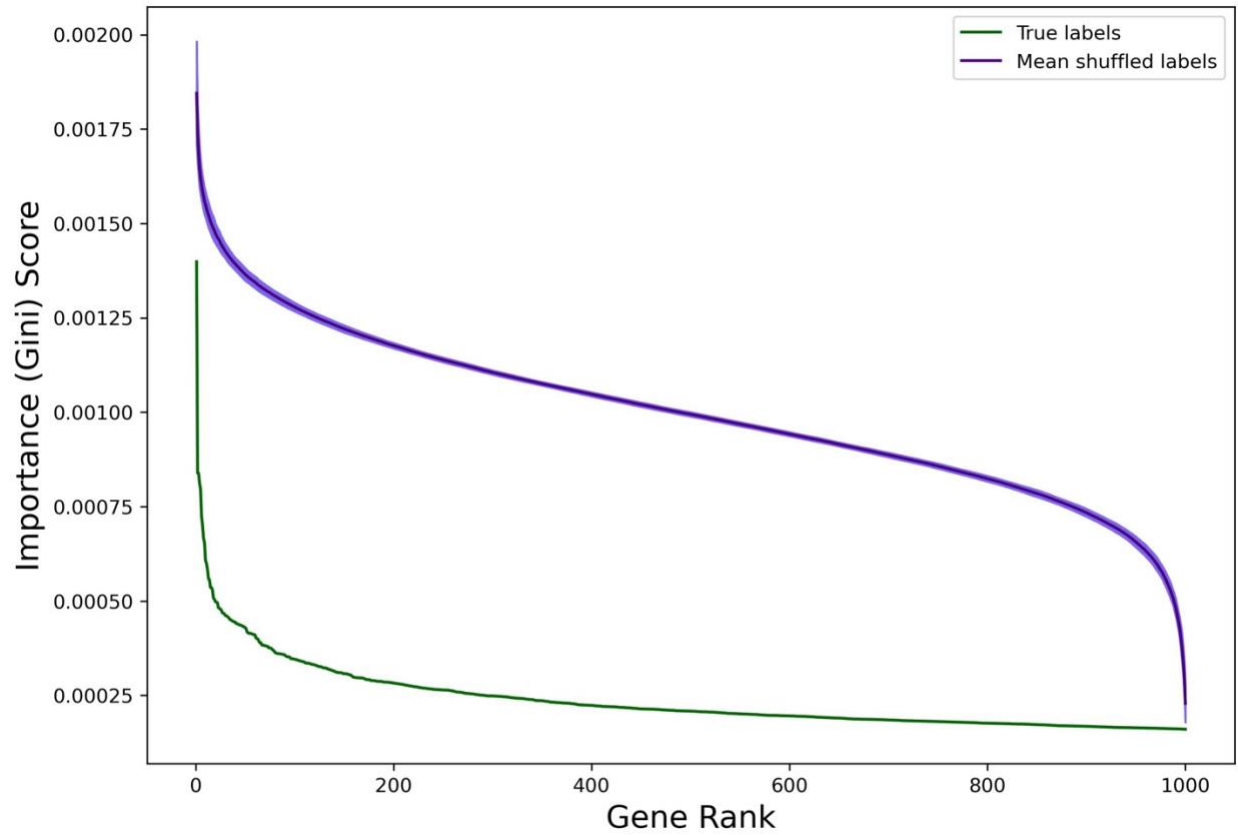

Figure S13. The importance scores in classification of AR alterations versus gene ranks extracted from the model trained using true labels (green) and the mean and standard deviation of importance scores of the gene ranks over 100 permutations of training the random forest with randomly shuffled labels (purple).

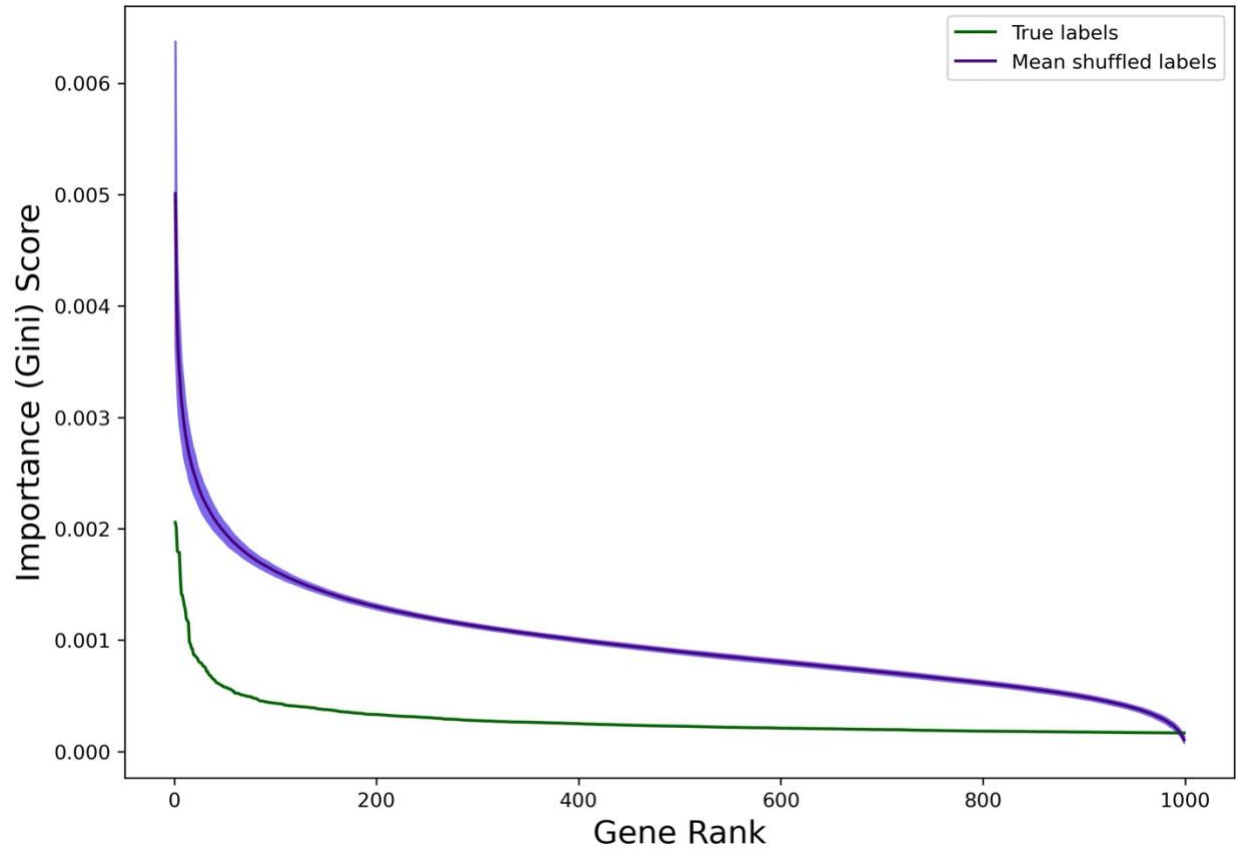

Figure S14. The importance scores in classification of ERBB4 alterations versus gene ranks extracted from the model trained using true labels (green) and the mean and standard deviation of importance scores of the gene ranks over 100 permutations of training the random forest with randomly shuffled labels (purple).

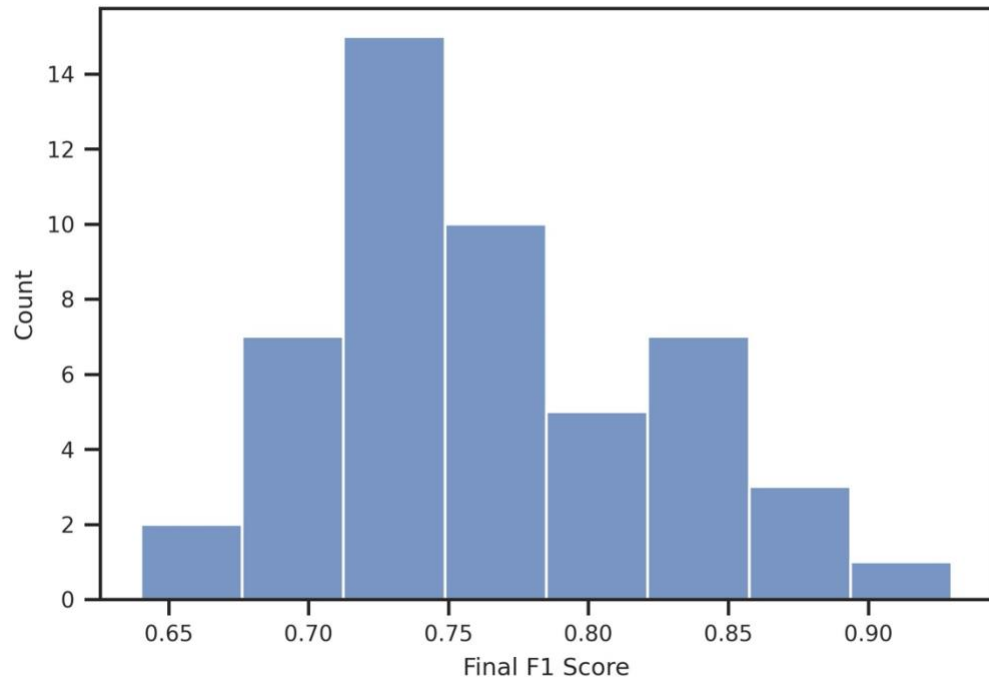

Figure S15. Distribution of F1 scores obtained from performing 5-fold CV on samples selected based on the best mode of analysis found previously.

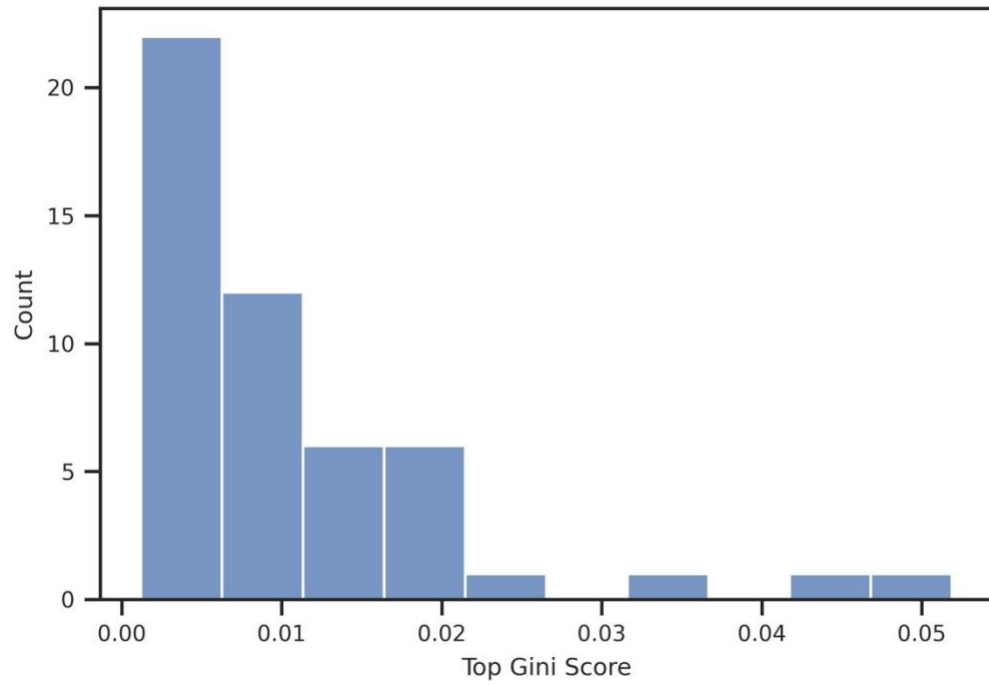

Figure S16. Distribution of top Gini scores from the most contributing feature to classification obtained after training the model using all samples from the best mode of analysis found previously.

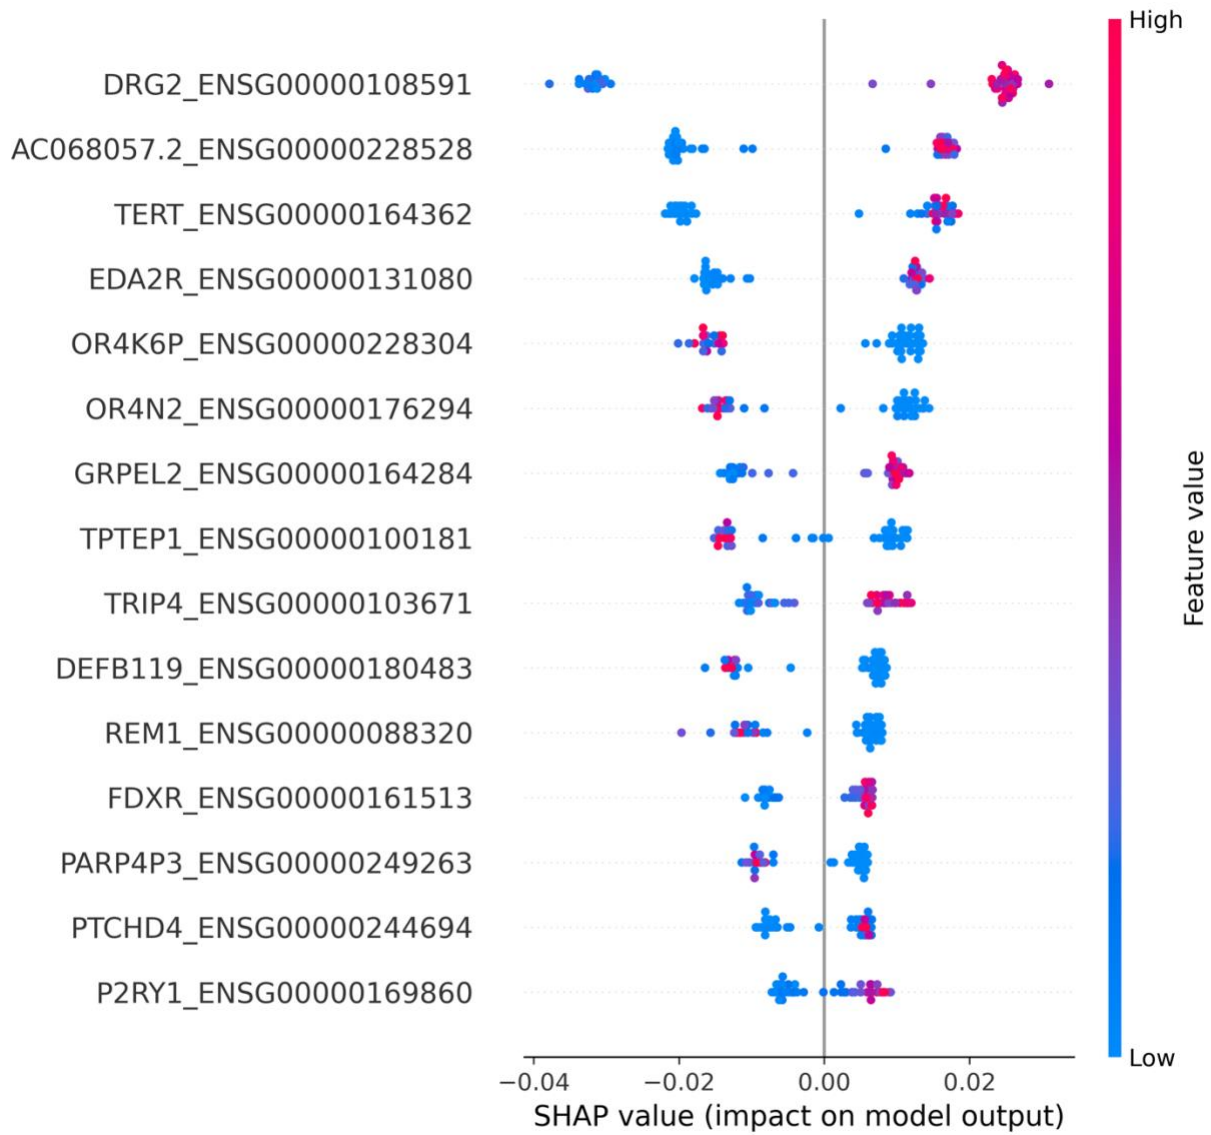

Figure S17. SHAP importance of top 15 features contributing to classification of samples based on *ATR*X mutations

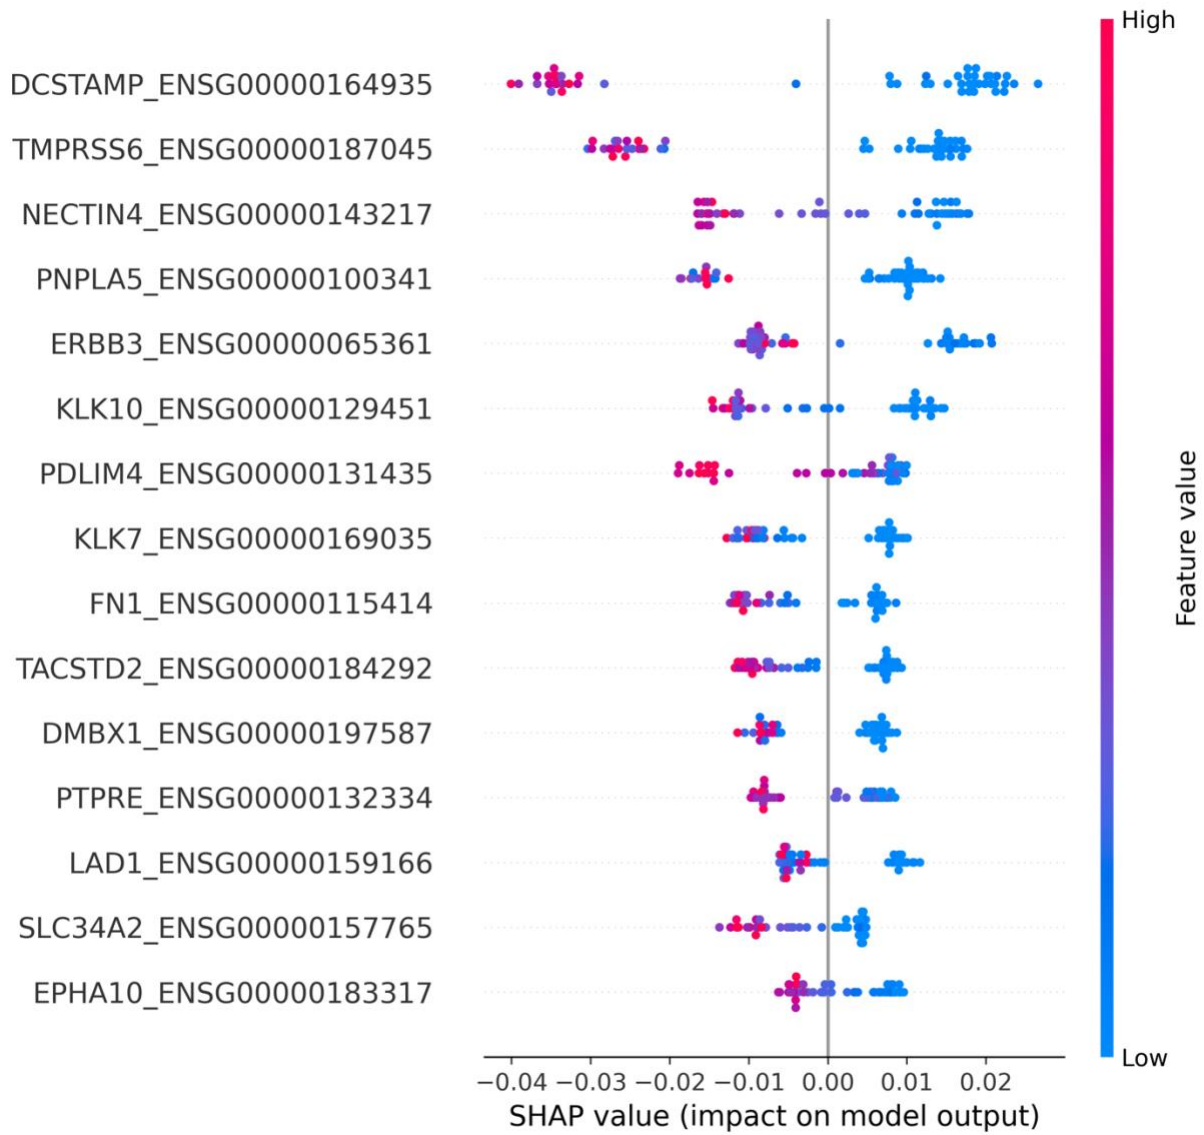

Figure S18. SHAP importance of top 15 features contributing to classification of samples based on *BRAF* mutations

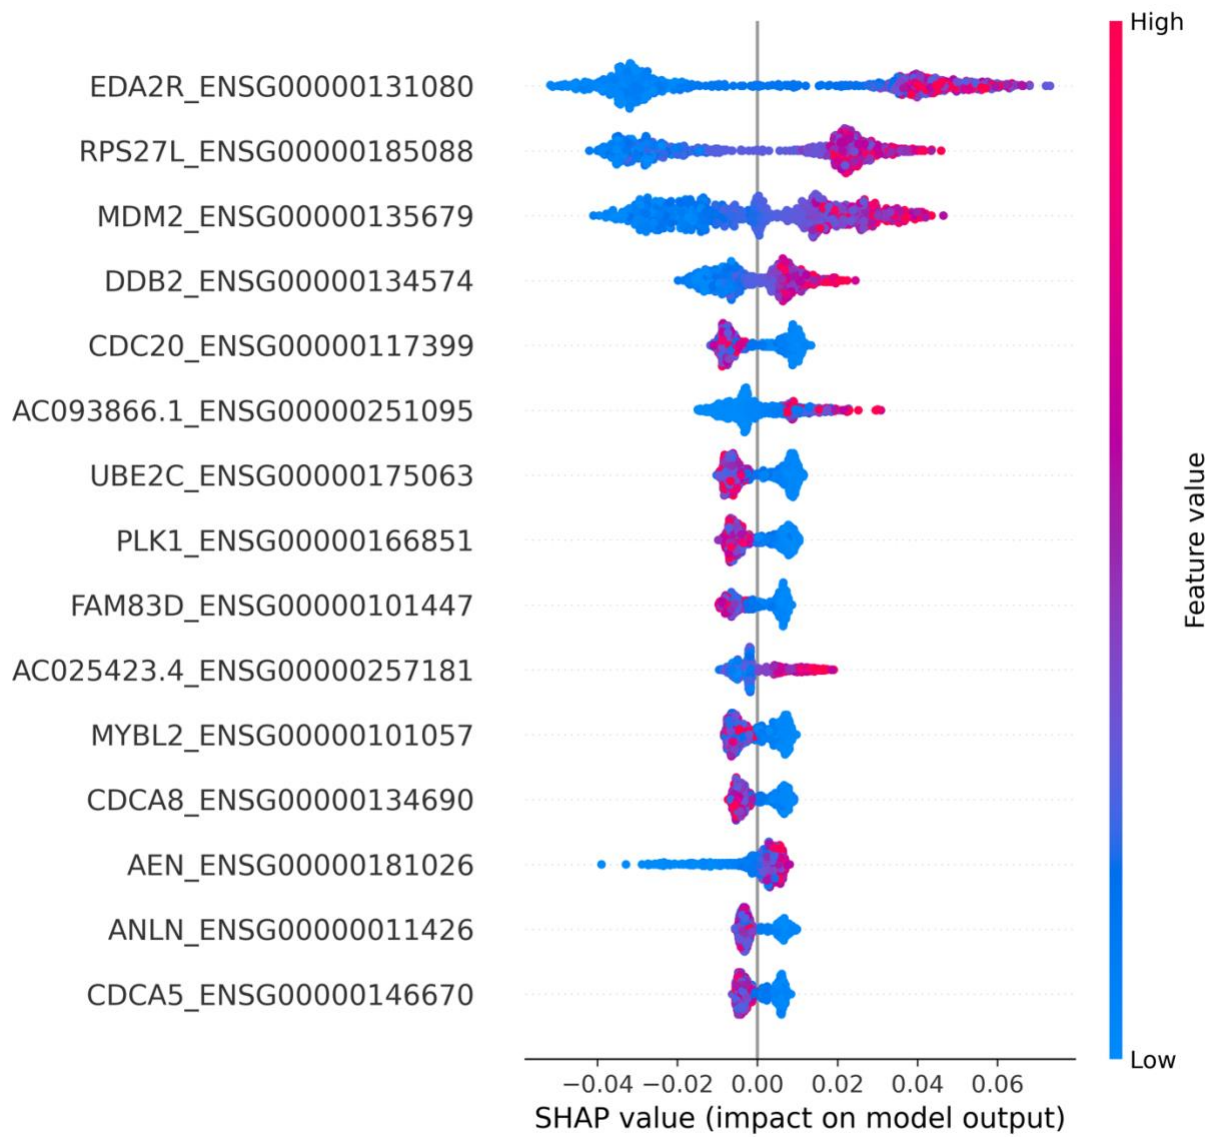

Figure S19. SHAP importance of top 15 features contributing to classification of samples based on *TP53* mutations

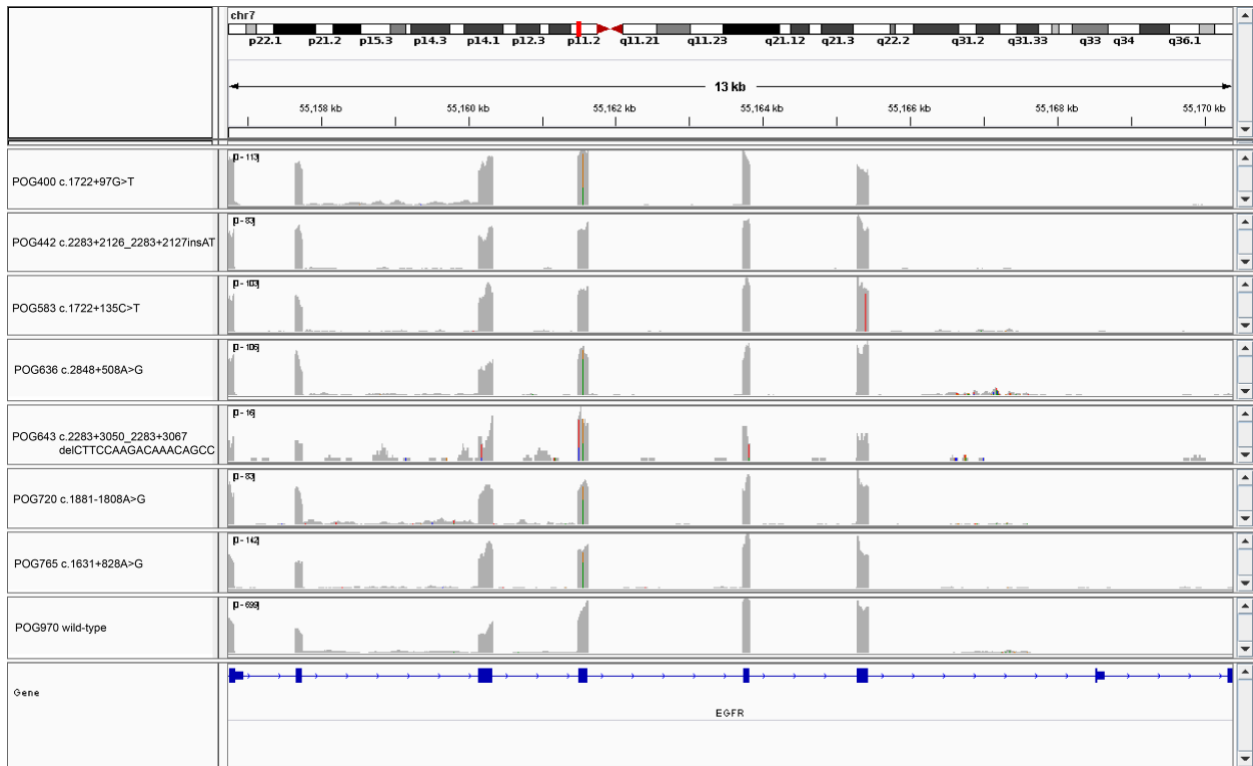

Figure S20. Examples of samples with EFGR intron variants that were predicted as having impactful mutations by the RF model

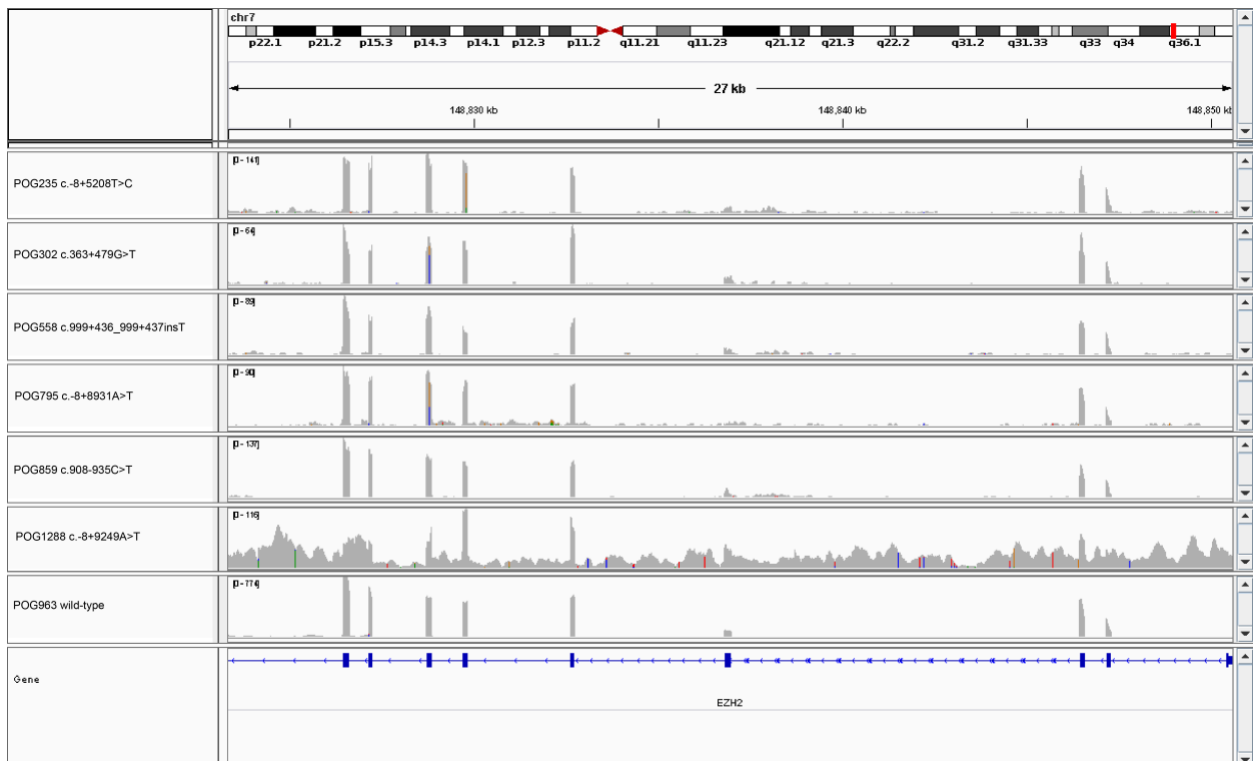

Figure S21. Examples of samples with EZH2 intron variants that were predicted as having impactful mutations by the RF model

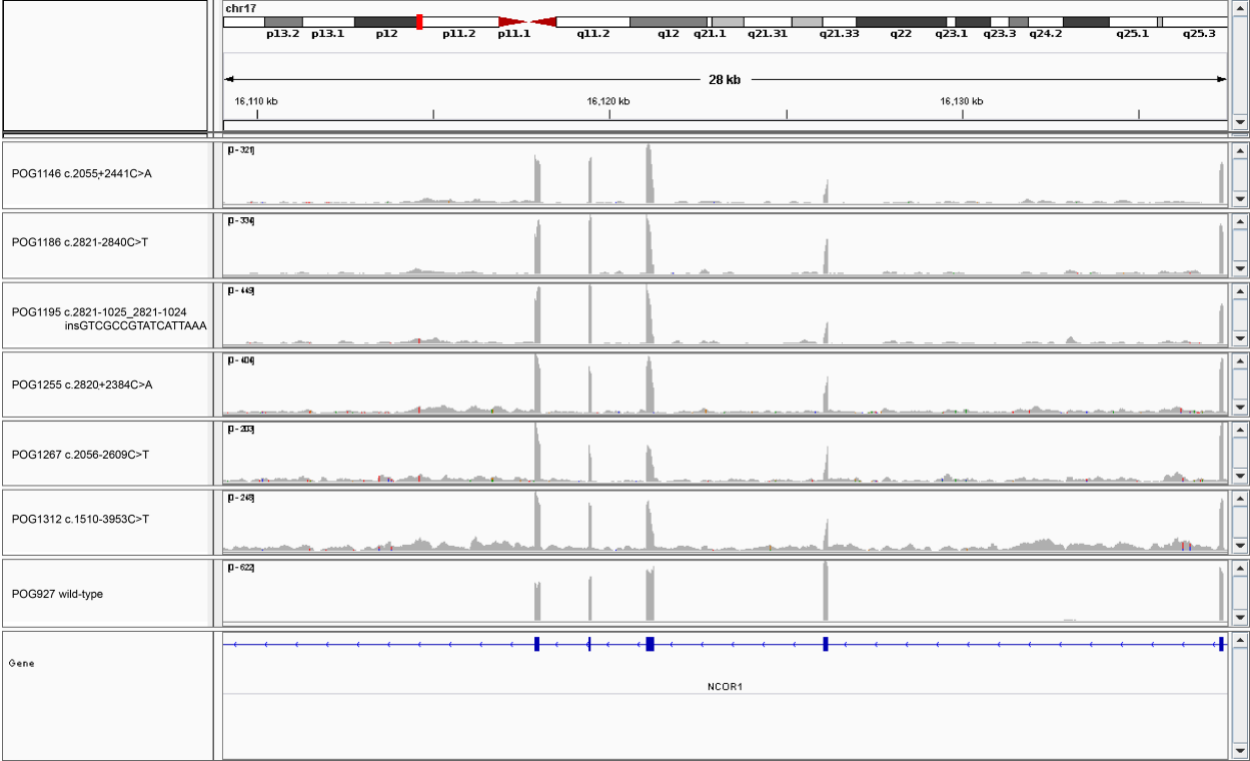

Figure S22. Examples of samples with NCOR1 intron variants that were predicted as having impactful mutations by the RF model

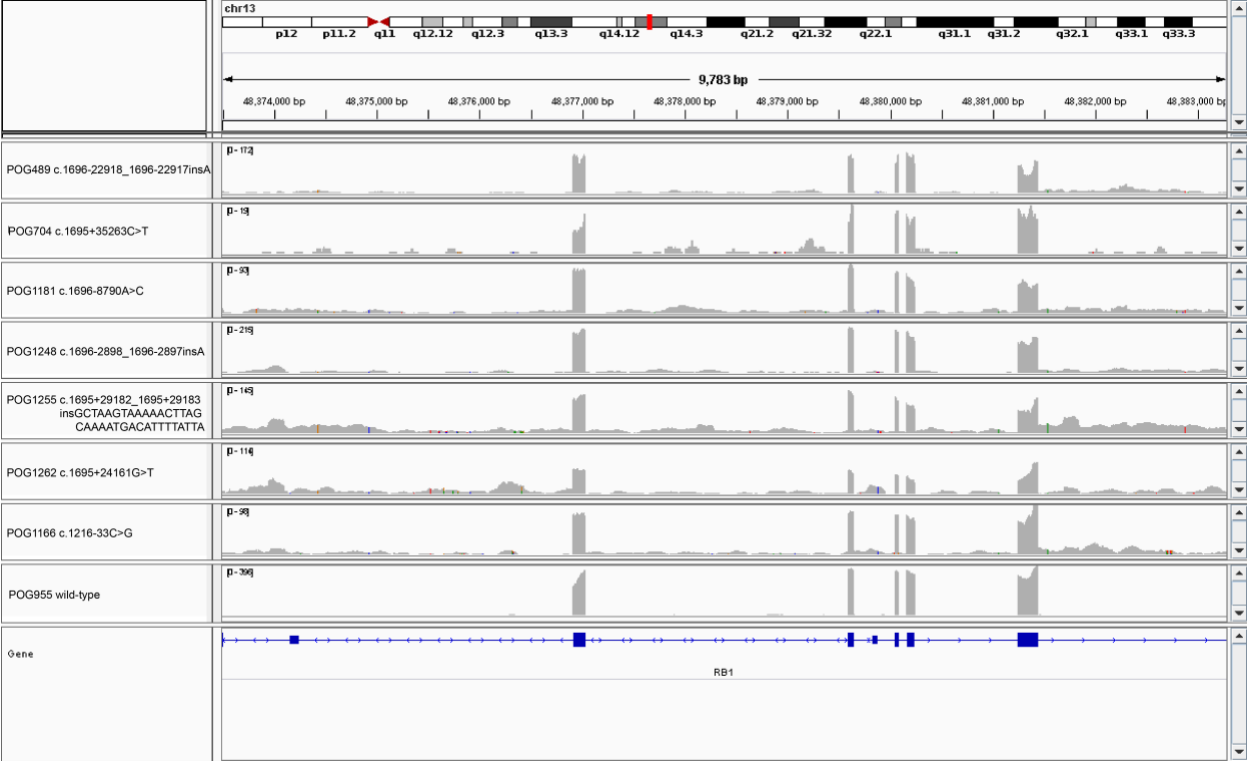

Figure S23. Examples of samples with RB1 intron variants that were predicted as having impactful mutations by the RF model
